# Supplementary material for: Two-dimensional shear wave elastography predicts survival in advanced chronic liver disease
Source: HighWire-hosted journal article supplement (doi:10.1136/gutjnl-2020-323419), 2021-01-21
Supplement: gutjnl-2020-323419supp001_data_supplement.pdf [file gutjnl-2020-323419supp001_data_supplement.pdf]

### Supplementary Materials

This appendix is intended to provide readers with additional information about the present study. Supplement to: Jonel Trebicka, Wenyi Gu, Victor de Lédinghen, Christophe Aubé, Aleksander Krag, Christian P. Strassburg et al.

Two-Dimensional Shear Wave Elastography Predicts Survival in Advanced Chronic Liver Disease

#### Table of Contents

|                               | Contents                                                                                                                                                                                                             | Pages     |
|-------------------------------|----------------------------------------------------------------------------------------------------------------------------------------------------------------------------------------------------------------------|-----------|
| Supplementary Methods         | Procedure of 2D-SWE, TE and p-SWE; <u>definition of ascites;</u><br><u>definition of non-invasive scores</u>                                                                                                         | <u>4</u>  |
| <u>Supplementary Table 1</u>  | <u>Numbers of inclusion, demographic data and coefficient</u><br><u>variation of each participated center with 2D-SWE or p-</u><br><u>SWE</u>                                                                        | <u>5</u>  |
| <u>Supplementary Table 2</u>  | <u>Intraclass correlation coefficient of intercenters and</u><br><u>interobservers reliability.</u>                                                                                                                  | <u>6</u>  |
| Supplementary Table <u>3</u>  | Parameters that related to the outcome and put into<br>regression analysis                                                                                                                                           | <u>7</u>  |
| Supplementary Table <u>4</u>  | <u>Valid and missing value in cohort of patients with 2D-SWE</u><br><u>and additional cohort of p-SWE</u>                                                                                                            | <u>8</u>  |
| <u>Supplementary Table 5</u>  | <u>Portal and systemic hemodynamic results of compensated</u><br><u>and decompensated patients included</u>                                                                                                          | <u>9</u>  |
| Supplementary Table <u>6</u>  | Univariate and multivariate Cox regression analysis in<br>compensated, <u>decompensated</u> and all patients for 2-year<br>mortality and all-time of follow-up                                                       | <u>10</u> |
| <u>Supplementary Table 7</u>  | <u>Univariate and multivariate Cox regression analysis in</u><br><u>decompensated patients for 28-day and 2-year mortality after</u><br><u>adjusted for age and MELD score</u>                                       | <u>11</u> |
| Supplementary Table <u>8</u>  | Best cut-off value of SWE and related sensitivity, specificity<br>for mortality                                                                                                                                      | <u>12</u> |
| Supplementary Table <u>9</u>  | Best cut-off value of SWE and related sensitivity, specificity,<br>positive predictive value and negative predictive value with<br>different MELD scores                                                             | <u>12</u> |
| Supplementary Table <u>10</u> | Best cut-off for MELD score and L-SWE of 2-year out-come<br>in compensated patients and decompensated patients, and<br>related sensitivity, specificity, positive predictive value, and<br>negative predictive value | <u>13</u> |
| Supplementary Table <u>11</u> | Univariate and multivariate competing risk (death as<br>competing risk) analysis of SWE with outcome of<br>development of decompensations in 2 years                                                                 | <u>14</u> |
| Supplementary Table <u>12</u> | Baseline characteristics of <u>cohort with 2D-SWE and cohort</u>                                                                                                                                                     | <u>15</u> |

|                               |                                                                                                                                                                                                                                                                                                                     |           |
|-------------------------------|---------------------------------------------------------------------------------------------------------------------------------------------------------------------------------------------------------------------------------------------------------------------------------------------------------------------|-----------|
|                               | <u>with p-SWE</u>                                                                                                                                                                                                                                                                                                   |           |
| <u>Supplementary Table 13</u> | <u>Baseline characteristics of compensated patients and randomly selected into 2/3 of derivation group and 1/3 of internal validation group</u>                                                                                                                                                                     | <u>16</u> |
| <u>Supplementary Table 14</u> | <u>Baseline characteristics of decompensated patients and randomly selected into 2/3 of derivation group and 1/3 of internal validation group</u>                                                                                                                                                                   | <u>17</u> |
| Supplementary Table <u>15</u> | Multivariate analysis of TE and MELD score of 2-year mortality                                                                                                                                                                                                                                                      | <u>18</u> |
| Supplementary Figure 1        | Flow chart of the <u>2D-SWE</u> derivation and <u>p-SWE additional cohort</u>                                                                                                                                                                                                                                       | <u>19</u> |
| <u>Supplementary Figure 2</u> | <u>Violin plot of L-SWE measurements of each participated center.</u>                                                                                                                                                                                                                                               | <u>20</u> |
| <u>Supplementary Figure 3</u> | <u>ROC curve of combination of SWE and MELD, SWE, ALBI score, FIB-4 score and APRI score; Time-dependent area under the curve of APRI, FIB4 and ALBI score</u>                                                                                                                                                      | <u>21</u> |
| Supplementary Figure <u>4</u> | ROC curve of combination of SWE and MELD, SWE, MELD score and Child-Pugh score for prediction of mortality; Calibration plot of MELD score and SWE combined with MELD score; Kaplan Meier curve of patients with MELD score < 10, comparison between SWE > 20 kPa and < 20 kPa and of patients with MELD score > 10 | <u>22</u> |
| Supplementary Figure <u>5</u> | Density curve of patients died days during 2-year of follow-up; Density curve of L-SWE distribution of patients with good, intermediate and poor prognosis.                                                                                                                                                         | <u>23</u> |
| Supplementary Figure <u>6</u> | ROC curve of decompensations development; cumulative incidence of decompensations of patients with MELD score < 10, comparison between SWE > 20 kPa and < 20 kPa and of patients with MELD score > 10, comparison between SWE > 20 kPa and < 20 kPa                                                                 | <u>24</u> |
| Supplementary Figure <u>7</u> | Cumulative incidence of development of ascites (death as competing risk), and hepatic encephalopathy (death as competing risk) over two years in patients with good, intermediate and poor prognosis.                                                                                                               | <u>25</u> |
| Supplementary Figure <u>8</u> | Calibration plot of the SWE and MELD in the mortality outcome prediction of validation cohort; ROC curve of MELD score and SWE combined with MELD score in                                                                                                                                                          | <u>26</u> |

|                                |                                                                                                                                                                                                                                                                                                           |           |
|--------------------------------|-----------------------------------------------------------------------------------------------------------------------------------------------------------------------------------------------------------------------------------------------------------------------------------------------------------|-----------|
|                                | prediction 2-year mortality of validation cohort                                                                                                                                                                                                                                                          |           |
| Supplementary Figure 9         | <u>Decision tree of the derivation cohort with 2D-SWE;</u><br>Decision tree of the <u>additional cohort validate with p-SWE</u>                                                                                                                                                                           | <u>27</u> |
| <u>Supplementary Figure 10</u> | <u>Kaplan Meier curve of 2-year survival in compensated patients randomly selected into derivation and internal validation groups</u>                                                                                                                                                                     | <u>28</u> |
| <u>Supplementary Figure 11</u> | <u>Kaplan Meier curve of 2-year survival in decompensated patients randomly selected into derivation and internal validation groups</u>                                                                                                                                                                   | <u>29</u> |
| Supplementary Figure 12        | Time-dependent area under the curve of TE and SWE;<br>Time-dependent area under the curve of TE combined with MELD score and SWE combined with MELD score.                                                                                                                                                | <u>30</u> |
| Supplementary Figure 13        | ROC curve of TE in the outcome prediction and compared with other models; Kaplan Meier curve of patients with MELD lower or higher than 10, compared by TE lower and greater than 20kPa; Kaplan Meier curve of patients with TE lower or greater than 20kPa, combined with MELD lower or greater than 10. | <u>31</u> |
| Supplementary Figure 14        | Etiology sensitive analysis of Kaplan Meier survival curve in different causes of chronic liver disease, compared among different prognosis group, in alcohol-related chronic liver diseases, HCV, HBV, NAFLD and other causes.                                                                           | <u>32</u> |
| Supplementary Figure 15        | Center sensitivity analysis of ROC curve in South and North Europe of 2-year mortality; Kaplan Meier curve of South and North Europe in three group of different prognoses                                                                                                                                | <u>33</u> |
| <u>Supplementary Figure 16</u> | <u>Histogram of date distribution of the SWE measurement of patients included from all participated centers; Survival function curve of patients included from different time periods.</u>                                                                                                                | <u>34</u> |
| <u>Supplementary Figure 17</u> | <u>River diagram of dynamic changes at baseline and during follow-up of the patients; Distribution of the follow-up time of patients with good prognosis, intermediate prognosis and poor prognosis</u>                                                                                                   | <u>35</u> |
| Supplementary Reference        |                                                                                                                                                                                                                                                                                                           | <u>36</u> |

---

## Supplementary Methods

### Two-dimension shear wave elastography (2D-SWE) procedure

Up to five measurements were repeated to avoid bias. A mean value of the total number of all measurements was calculated and documented. All L-SWE measurements were performed by experienced physicians. The participants were required to fast for at least two hours prior to measurement. L-SWE were carried out through the right intercostal space of the supine position during a breath-hold, with the right arm straightened, and at least 10mm below the liver capsule. The Q-box was used over the selected region of interest (ROI) to obtain the stiffness value. The diameter of the Q box was set to >15 mm. Valid L-SWE was defined as LSM with an interquartile range (IQR) / median (M) value below 30%<sup>1,2</sup>. The Aixplorer US system (SuperSonic Imagine S.A., Aix-en-Provence, France) with a convex broadband probe (SC6-1) was used.

### Transient elastography (TE) procedure

One-dimension TE was measured using the Fibroscan® (Echosens, Paris, France). TE measurements were performed at baseline as per EASL-ALEH clinical practice guideline<sup>3,4</sup>. In the derivation study, TE values with a success rate of at least 80% and with a ratio of IQR / M < 0.3 were considered valid and used for statistical analysis.

### Point shear wave elastography (p-SWE) procedure

The protocol for pSWE of the liver utilizing the Elast PQ module on the Philips system was previously described<sup>5,6</sup>. Briefly, patients were fasted at least 5 hours and were placed in a supine position. The transducer was positioned in an intercostal space on the medio-axillary line. The rectangular ROI for pSWE was placed 1-1.5cm underneath the liver capsule, centrally situated targeted by B-mode ultrasound imaging. At least 5 measurements, were performed per patient in mid-inspiratory position.

### Definition of ascites

Ascites was defined according to the 2020 EASL guideline<sup>7</sup>. Mild ascites was detected by ultrasound. Moderate ascites was defined by moderate symmetrical distension of abdomen. Large or gross ascites was detected by clinically marked abdominal distension.

### Definition of non-invasive scores<sup>8-10</sup>

FIB-4 score = [Age (years) × AST Level (U/L)] / [Platelet Count (10<sup>9</sup>/L) × ALT (U/L)<sup>(1/2)</sup>]

APRI score = [AST Level (IU/L) / AST (Upper Limit of Normal) (IU/L)] / Platelet Count (10<sup>9</sup>/L) × 100

ALBI score = [log<sub>10</sub> Bilirubin (mmol/l) × 0.66] + [albumin(g/l) × -0.085]

**Supplementary table 1.** Numbers of inclusion, demographic data and coefficient variation of each participated center with 2D-SWE or p-SWE

| <b>Participated center</b>                                                 | <b>Screening<br/>n (%)</b> | <b>Valid inclusion<br/>n (%)</b> | <b>Male<br/>n (%)</b> | <b>Age<br/>M (IQR)</b>    | <b>L-SWE<br/>CV%</b> |
|----------------------------------------------------------------------------|----------------------------|----------------------------------|-----------------------|---------------------------|----------------------|
| <u>CHU du Haut-Lévêque</u>                                                 | <u>349 (16.2)</u>          | <u>333 (18.2)</u>                | <u>215 (64.6)</u>     | <u>55.1 (45.0 - 64.5)</u> | <u>123.3%</u>        |
| <u>Centre Hospitalier Universitaire<br/>d'Angers</u>                       | <u>336 (15.6)</u>          | <u>267 (14.6)</u>                | <u>181 (67.8)</u>     | <u>55.0 (47.0 – 61.0)</u> | <u>89.1%</u>         |
| <u>University of Bonn</u>                                                  | <u>274 (12.8)</u>          | <u>237 (13)</u>                  | <u>130 (54.9)</u>     | <u>57.0 (50.5 - 63.9)</u> | <u>74.3%</u>         |
| <u>University of Southern Denmark &amp;<br/>Odense University Hospital</u> | <u>267 (12.4)</u>          | <u>209 (11.4)</u>                | <u>112 (53.8)</u>     | <u>57.0 (48.0 – 66.0)</u> | <u>58.5%</u>         |
| <u>Hôpital Beaujon Université Paris<br/>VII</u>                            | <u>193 (9.0)</u>           | <u>184 (10.1)</u>                | <u>136 (73.9)</u>     | <u>56.3 (50.7 - 61.6)</u> | <u>57.7%</u>         |
| <u>Hôpital Edouard Herriot</u>                                             | <u>148 (6.9)</u>           | <u>131 (7.2)</u>                 | <u>82 (62.6)</u>      | <u>56.0 (47.0 – 62.0)</u> | <u>74.4%</u>         |
| <u>J. W. Goethe University Hospital</u>                                    | <u>122 (5.7)</u>           | <u>117 (6.4)</u>                 | <u>60 (51.3)</u>      | <u>52.0 (40 - 59)</u>     | <u>76.5%</u>         |
| <u>Hôpital Cochin</u>                                                      | <u>121 (5.6)</u>           | <u>82 (4.5)</u>                  | <u>64 (78)</u>        | <u>63.0 (58 - 68)</u>     | <u>41.8%</u>         |
| <u>University Hospital Dubrava</u>                                         | <u>82 (3.8)</u>            | <u>62 (3.4)</u>                  | <u>47 (75.8)</u>      | <u>48 (34.8 - 54.3)</u>   | <u>78.8%</u>         |
| <u>Third Affiliated Hospital Sun-Yat<br/>Sen University</u>                | <u>68 (3.2)</u>            | <u>53 (2.9)</u>                  | <u>40 (75.5)</u>      | <u>37.0 (26.5 - 46)</u>   | <u>72.2%</u>         |
| <u>University Hospital Antwerp</u>                                         | <u>58 (2.7)</u>            | <u>53 (2.9)</u>                  | <u>29 (54.7)</u>      | <u>45.0 (33.0 - 55.5)</u> | <u>68.5%</u>         |
| <u>Prague SSI</u>                                                          | <u>34 (1.6)</u>            | <u>33 (1.8)</u>                  | <u>13 (39.4)</u>      | <u>54 (37.5 - 62)</u>     | <u>67.8%</u>         |
| <u>Institute for Clinical and<br/>Experimental Medicine (IKEM)</u>         | <u>32 (1.5)</u>            | <u>31 (1.7)</u>                  | <u>12 (38.7)</u>      | <u>54 (38 - 62)</u>       | <u>68.0%</u>         |
| <u>“Victor Babes” University of<br/>Medicine and Pharmacy</u>              | <u>28 (1.3)</u>            | <u>26 (1.4)</u>                  | <u>15 (57.7)</u>      | <u>50 (34.5 - 56)</u>     | <u>45.7%</u>         |
| <u>Universitätsspital Bern</u>                                             |                            |                                  |                       |                           |                      |
| <u>Universitätsklinik für Viszerale<br/>Chirurgie und Medizin</u>          | <u>26 (1.2)</u>            | <u>9 (0.5)</u>                   | <u>4 (44.4)</u>       | <u>50 (34.5 - 56)</u>     | <u>61.5%</u>         |
| <u>Zhongshan Hospital Shanghai<br/>Fudan University</u>                    | <u>10 (0.5)</u>            | <u>0 (0)</u>                     | <u>0 (0)</u>          | <u>/</u>                  | <u>/</u>             |
| <u>Vienna</u>                                                              | <u>211</u>                 | <u>119</u>                       | <u>81 (68.1)</u>      | <u>55 (46.0 – 66.0)</u>   | <u>93.5%</u>         |
| <b>Total</b>                                                               | <b>2359</b>                | <b>1946</b>                      | <b>1221 (62.8)</b>    | <b>55 (45.9 – 62.9)</b>   | <b>90.9%</b>         |

Abbreviation: CV, coefficient of variation; M, median; IQR, interquartile range.

**Supplementary table 2.** Intraclass correlation coefficient of intercenters and interobservers reliability.

| <u>Intraclass Correlation Coefficient</u> |                         | <u>Intraclass Correlation<sub>b</sub></u> | <u>95% Confidence Interval</u> |                    | <u>F Test with True Value 0</u> |            |            |              |
|-------------------------------------------|-------------------------|-------------------------------------------|--------------------------------|--------------------|---------------------------------|------------|------------|--------------|
|                                           |                         |                                           | <u>Lower Bound</u>             | <u>Upper Bound</u> | <u>Value</u>                    | <u>df1</u> | <u>df2</u> | <u>Sig</u>   |
| <u>Centers</u>                            |                         |                                           |                                |                    |                                 |            |            |              |
| <u>ANG</u>                                | <u>Average Measures</u> | <u>.921<sup>c</sup></u>                   | <u>0.905</u>                   | <u>0.935</u>       | <u>12.677</u>                   | <u>328</u> | <u>656</u> | <u>0.000</u> |
| <u>BER</u>                                | <u>Average Measures</u> | <u>.972<sup>c</sup></u>                   | <u>0.940</u>                   | <u>0.988</u>       | <u>36.007</u>                   | <u>18</u>  | <u>36</u>  | <u>0.000</u> |
| <u>BJN</u>                                | <u>Average Measures</u> | <u>.951<sup>c</sup></u>                   | <u>0.937</u>                   | <u>0.962</u>       | <u>20.363</u>                   | <u>176</u> | <u>352</u> | <u>0.000</u> |
| <u>BON</u>                                | <u>Average Measures</u> | <u>.849<sup>c</sup></u>                   | <u>0.810</u>                   | <u>0.881</u>       | <u>6.623</u>                    | <u>206</u> | <u>412</u> | <u>0.000</u> |
| <u>COC</u>                                | <u>Average Measures</u> | <u>.985<sup>c</sup></u>                   | <u>0.978</u>                   | <u>0.991</u>       | <u>68.352</u>                   | <u>60</u>  | <u>120</u> | <u>0.000</u> |
| <u>HEH</u>                                | <u>Average Measures</u> | <u>.977<sup>c</sup></u>                   | <u>0.970</u>                   | <u>0.983</u>       | <u>44.205</u>                   | <u>128</u> | <u>256</u> | <u>0.000</u> |
| <u>IKM</u>                                | <u>Average Measures</u> | <u>.980<sup>c</sup></u>                   | <u>0.964</u>                   | <u>0.990</u>       | <u>51.097</u>                   | <u>30</u>  | <u>60</u>  | <u>0.000</u> |
| <u>ODE</u>                                | <u>Average Measures</u> | <u>.963<sup>c</sup></u>                   | <u>0.955</u>                   | <u>0.970</u>       | <u>27.280</u>                   | <u>258</u> | <u>516</u> | <u>0.000</u> |
| <u>SSI</u>                                | <u>Average Measures</u> | <u>.982<sup>c</sup></u>                   | <u>0.968</u>                   | <u>0.990</u>       | <u>54.886</u>                   | <u>32</u>  | <u>64</u>  | <u>0.000</u> |
| <u>TIM</u>                                | <u>Average Measures</u> | <u>.994<sup>c</sup></u>                   | <u>0.982</u>                   | <u>0.999</u>       | <u>176.008</u>                  | <u>8</u>   | <u>16</u>  | <u>0.000</u> |
| <u>UZA</u>                                | <u>Average Measures</u> | <u>.740<sup>c</sup></u>                   | <u>0.579</u>                   | <u>0.847</u>       | <u>3.852</u>                    | <u>46</u>  | <u>92</u>  | <u>0.000</u> |
| <u>ZHE</u>                                | <u>Average Measures</u> | <u>.994<sup>c</sup></u>                   | <u>0.991</u>                   | <u>0.997</u>       | <u>174.214</u>                  | <u>51</u>  | <u>102</u> | <u>0.000</u> |
| <u>Operators</u>                          |                         |                                           |                                |                    |                                 |            |            |              |
| <u>AB</u>                                 | <u>Average Measures</u> | <u>.951<sup>c</sup></u>                   | <u>0.473</u>                   | <u>0.999</u>       | <u>20.213</u>                   | <u>2</u>   | <u>4</u>   | <u>0.008</u> |
| <u>AH</u>                                 | <u>Average Measures</u> | <u>.710<sup>c</sup></u>                   | <u>-10.151</u>                 | <u>1.000</u>       | <u>3.453</u>                    | <u>1</u>   | <u>2</u>   | <u>0.204</u> |
| <u>CM</u>                                 | <u>Average Measures</u> | <u>.986<sup>c</sup></u>                   | <u>0.964</u>                   | <u>0.995</u>       | <u>69.953</u>                   | <u>12</u>  | <u>24</u>  | <u>0.000</u> |
| <u>FTT</u>                                | <u>Average Measures</u> | <u>.999<sup>c</sup></u>                   | <u>0.995</u>                   | <u>1.000</u>       | <u>915.274</u>                  | <u>5</u>   | <u>10</u>  | <u>0.000</u> |
| <u>HG</u>                                 | <u>Average Measures</u> | <u>.967<sup>c</sup></u>                   | <u>0.947</u>                   | <u>0.980</u>       | <u>30.197</u>                   | <u>49</u>  | <u>98</u>  | <u>0.000</u> |
| <u>MP</u>                                 | <u>Average Measures</u> | <u>.997<sup>c</sup></u>                   | <u>0.985</u>                   | <u>1.000</u>       | <u>331.462</u>                  | <u>4</u>   | <u>8</u>   | <u>0.000</u> |
| <u>RS</u>                                 | <u>Average Measures</u> | <u>.996<sup>c</sup></u>                   | <u>0.991</u>                   | <u>0.998</u>       | <u>251.181</u>                  | <u>15</u>  | <u>30</u>  | <u>0.000</u> |

**Supplementary table 3.** Parameters that related to the outcome and put into regression analysis

| Parameters                                 |
|--------------------------------------------|
| Male sex                                   |
| 2D-SWE at baseline (kPa)                   |
| Age (year)                                 |
| CRP                                        |
| Bilirubin (mg/dl)                          |
| Platelets (G/l)                            |
| White blood cell count ( $\times 10^9/L$ ) |
| INR                                        |
| Serum creatinine (mg/dl)                   |
| Albumin (g/l)                              |
| Alanine transaminase (U/L)                 |
| Variceal bleeding episode                  |
| Hepatic encephalopathy                     |
| Ascites grade                              |
| Bacterial infections episode               |
| spontaneous bacterial peritonitis episode  |
| Abstinence from alcohol drinking           |
| Alkaline phosphatase (U/L)                 |
| aspartate transaminase (U/L)               |

**Supplementary table 4.** Valid and missing value in cohort of patients with 2D-SWE and additional cohort of p-SWE

| Parameters                     | Cohort with 2D-SWE |                                   | Additional cohort with p-SWE |                                |
|--------------------------------|--------------------|-----------------------------------|------------------------------|--------------------------------|
|                                | Valid              | Missing /<br>Lost to<br>follow-up | Valid                        | Missing / Lost to<br>follow-up |
| 2D-SWE                         | 1827               | 0                                 | 119                          | 0                              |
| TE                             | 754                | 1073                              | 119                          | 0                              |
| Cause of chronic liver disease | 1546               | 281                               | 119                          | 0                              |
| Age                            | 1826               | 1                                 | 119                          | 0                              |
| Gender                         | 1826               | 1                                 | 119                          | 0                              |
| Height (m)                     | 1392               | 435                               | 119                          | 0                              |
| Weight (kg)                    | 1518               | 309                               | 118                          | 1                              |
| BMI (kg/m <sup>2</sup> )       | 1467               | 360                               | 118                          | 1                              |
| ALT (U/L)                      | 1782               | 45                                | 117                          | 2                              |
| AST (U/L)                      | 1723               | 104                               | 118                          | 1                              |
| Alkaline phosphatase (U/L)     | 1691               | 136                               | 118                          | 1                              |
| Bilirubin (mg/dl)              | 1766               | 61                                | 118                          | 1                              |
| Creatinine (mg/dl)             | 1758               | 69                                | 117                          | 2                              |
| CRP                            | 960                | 867                               | 115                          | 4                              |
| WBC (×10 <sup>9</sup> /L)      | 1331               | 496                               | 118                          | 1                              |
| Albumin (g/l)                  | 1702               | 125                               | 118                          | 1                              |
| Platelets (G/l)                | 1796               | 31                                | 118                          | 1                              |
| INR                            | 1729               | 98                                | 118                          | 1                              |
| MELD score                     | 1667               | 160                               | 117                          | 2                              |
| Child-Pugh score               | 1640               | 187                               | 117                          | 2                              |
| Child-Pugh class               | 1640               | 187                               | 117                          | 2                              |
| 28-day follow-up               | 1827               | 0                                 | 119                          | 0                              |
| 90-day follow-up               | 1783               | 44                                | 113                          | 6                              |
| 1-year follow up               | 1618               | 209                               | 84                           | 35                             |
| 2-year follow-up               | 1293               | 534                               | 46                           | 73                             |



**Supplementary table 5. Portal and systemic hemodynamic results of compensated and decompensated patients included**

| <b><u>Parameter</u></b>                   | <b><u>Compensated</u></b> | <b><u>Decompensated</u></b> | <b><u>P* value</u></b> | <b><u>All</u></b>       | <b><u>R**</u></b> | <b><u>Correlation P</u></b> |
|-------------------------------------------|---------------------------|-----------------------------|------------------------|-------------------------|-------------------|-----------------------------|
| <u>Heart rate (bpm)</u><br><u>n = 194</u> | <u>68 (60 - 77.8)</u>     | <u>72 (64 - 82)</u>         | <u>0.023</u>           | <u>70 (61 - 80)</u>     | <u>0.118</u>      | <u>0.101</u>                |
| <u>MAP (mmHg)</u><br><u>n = 193</u>       | <u>92 (80 - 99)</u>       | <u>88.3 (78 - 96.2)</u>     | <u>0.198</u>           | <u>90 (78.3 - 98)</u>   | <u>-0.162</u>     | <u>0.024</u>                |
| <u>HVPG (mmHg)</u><br><u>n = 140</u>      | <u>17 (11 - 20)</u>       | <u>20 (16 - 22)</u>         | <u>0.001</u>           | <u>18 (14 - 21)</u>     | <u>0.256</u>      | <u>0.002</u>                |
| <u>EF by TTE</u><br><u>n = 81</u>         | <u>62.2 (58.6 - 68.4)</u> | <u>66.1 (60.6 - 70.2)</u>   | <u>0.170</u>           | <u>64.6 (59.6 - 69)</u> | <u>0.241</u>      | <u>0.030</u>                |
| <u>MELD score</u><br><u>n = 194</u>       | <u>9 (7.3 - 13)</u>       | <u>12 (9 - 16)</u>          | <u>&lt;0.001</u>       | <u>11 (9 - 14)</u>      | <u>0.258</u>      | <u>&lt;0.001</u>            |

\*p values are compared between compensated and decompensated groups using Mann-Whitney U test;

\*\* R, Pearson correlation was calculated between the parameter and L-SWE;

Abbreviations: MAP, mean arterial pressure; EF, ejection fraction; SV, stroke volume; TTE, transthoracic echocardiography; PHPG, portal hepatic pressure gradient; HVPG, hepatic venous pressure gradient.

**Supplementary Table 6.** Univariate and multivariate Cox regression analysis in compensated and all patients for 2-year mortality and all-time of follow-up

| Parameters                                                                  | Univariate    |              |                                    |              | Multivariate     |              |                                    |              |
|-----------------------------------------------------------------------------|---------------|--------------|------------------------------------|--------------|------------------|--------------|------------------------------------|--------------|
|                                                                             | Pr > ChiSq    | Hazard Ratio | 95% Hazard Ratio Confidence Limits |              | Pr > ChiSq       | Hazard Ratio | 95% Hazard Ratio Confidence Limits |              |
| <b>All time of follow-up in all included patients in derivation cohort</b>  |               |              |                                    |              |                  |              |                                    |              |
| Gender                                                                      | 0.0253        | 1.485        | 1.050                              | 2.100        | ..               | ..           | ..                                 | ..           |
| 2D-SWE                                                                      | <0.0001       | 1.026        | 1.021                              | 1.031        | <0.0001          | 1.020        | 1.010                              | 1.030        |
| Age                                                                         | <0.0001       | 1.050        | 1.035                              | 1.066        | 0.0075           | 1.041        | 1.011                              | 1.073        |
| CRP                                                                         | <0.0001       | 1.014        | 1.007                              | 1.021        | 0.0024           | 1.017        | 1.006                              | 1.028        |
| Albumin                                                                     | <0.0001       | 0.976        | 0.965                              | 0.988        | 0.0051           | 0.964        | 0.940                              | 0.989        |
| <b>All time of follow-up in compensated patients of derivation cohort</b>   |               |              |                                    |              |                  |              |                                    |              |
| Gender                                                                      | ..            | ..           | ..                                 | ..           | ..               | ..           | ..                                 | ..           |
| 2D-SWE                                                                      | <0.0001       | 1.025        | 1.018                              | 1.033        | 0.0001           | 1.019        | 1.009                              | 1.029        |
| Age                                                                         | 0.0001        | 1.045        | 1.022                              | 1.069        | 0.0194           | 1.035        | 1.006                              | 1.065        |
| CRP                                                                         | 0.0073        | 1.015        | 1.004                              | 1.026        | 0.0056           | 1.015        | 1.004                              | 1.027        |
| Bilirubin                                                                   | 0.0283        | 1.098        | 1.01                               | 1.194        | 0.0500           | 1.102        | 1.000                              | 1.214        |
| Platelets                                                                   | 0.0118        | 0.996        | 0.992                              | 0.999        | ..               | ..           | ..                                 | ..           |
| WBC                                                                         | 0.0184        | 1.107        | 1.017                              | 1.204        | ..               | ..           | ..                                 | ..           |
| <b>2-year outcome in all included patients in derivation cohort</b>         |               |              |                                    |              |                  |              |                                    |              |
| Gender                                                                      | ..            | ..           | ..                                 | ..           | ..               | ..           | ..                                 | ..           |
| 2D-SWE                                                                      | <0.0001       | 1.028        | 1.022                              | 1.034        | 0.0009           | 1.019        | 1.008                              | 1.030        |
| Age                                                                         | <0.0001       | 1.054        | 1.034                              | 1.073        | 0.0010           | 1.062        | 1.025                              | 1.101        |
| CRP                                                                         | 0.0002        | 1.014        | 1.007                              | 1.022        | 0.0400           | 1.015        | 1.001                              | 1.029        |
| Albumin                                                                     | <0.0001       | 0.971        | 0.958                              | 0.983        | 0.0022           | 0.957        | 0.930                              | 0.984        |
| <b>2-year outcome in compensated patients of derivation cohort</b>          |               |              |                                    |              |                  |              |                                    |              |
| Gender                                                                      | ..            | ..           | ..                                 | ..           | ..               | ..           | ..                                 | ..           |
| 2D-SWE                                                                      | <.0001        | 1.027        | 1.019                              | 1.035        | <.0001           | 1.019        | 1.01                               | 1.028        |
| Age                                                                         | <.0001        | 1.07         | 1.042                              | 1.099        | <.0001           | 1.063        | 1.034                              | 1.093        |
| Bilirubin                                                                   | 0.0016        | 1.125        | 1.046                              | 1.209        | 0.0016           | 1.142        | 1.052                              | 1.241        |
| Platelets                                                                   | 0.0003        | 0.993        | 0.989                              | 0.997        | 0.0478           | 0.996        | 0.992                              | 1.000        |
| Albumin                                                                     | 0.0318        | 0.98         | 0.962                              | 0.998        | ..               | ..           | ..                                 | ..           |
| Variceal bleeding                                                           | 0.0023        | 2.587        | 1.404                              | 4.769        | ..               | ..           | ..                                 | ..           |
| <b><u>2-year outcome in decompensated patients of derivation cohort</u></b> |               |              |                                    |              |                  |              |                                    |              |
| <u>Gender</u>                                                               | <u>---</u>    | <u>---</u>   | <u>---</u>                         | <u>---</u>   | <u>---</u>       | <u>---</u>   | <u>---</u>                         | <u>---</u>   |
| <u>Age</u>                                                                  | <u>---</u>    | <u>---</u>   | <u>---</u>                         | <u>---</u>   | <u>---</u>       | <u>---</u>   | <u>---</u>                         | <u>---</u>   |
| <u>Bacterial infection</u>                                                  | <u>0.0046</u> | <u>1.58</u>  | <u>1.151</u>                       | <u>2.17</u>  | <u>0.0009</u>    | <u>1.744</u> | <u>1.254</u>                       | <u>2.425</u> |
| <u>2D-SWE</u>                                                               | <u>0.0201</u> | <u>1.019</u> | <u>1.003</u>                       | <u>1.035</u> | <u>0.0272</u>    | <u>1.023</u> | <u>1.003</u>                       | <u>1.043</u> |
| <u>INR</u>                                                                  | <u>0.0002</u> | <u>1.049</u> | <u>1.022</u>                       | <u>1.076</u> | <u>&lt;.0001</u> | <u>1.073</u> | <u>1.039</u>                       | <u>1.109</u> |
| <u>Bilirubin</u>                                                            | <u>0.0091</u> | <u>1.065</u> | <u>1.016</u>                       | <u>1.117</u> | <u>---</u>       | <u>---</u>   | <u>---</u>                         | <u>---</u>   |
| <u>Albumin</u>                                                              | <u>0.0232</u> | <u>0.97</u>  | <u>0.944</u>                       | <u>0.996</u> | <u>---</u>       | <u>---</u>   | <u>---</u>                         | <u>---</u>   |

**Supplementary Table 7. Univariate and multivariate Cox regression analysis in decompensated patients for 28-day and 2-year mortality after adjusted for age and MELD score**

| <u>Parameters</u>     | <u>Univariate</u>    |                     |                                           |              | <u>Multivariate</u>  |                     |                                           |              |
|-----------------------|----------------------|---------------------|-------------------------------------------|--------------|----------------------|---------------------|-------------------------------------------|--------------|
|                       | <u>Pr &gt; ChiSq</u> | <u>Hazard Ratio</u> | <u>95% Hazard Ratio Confidence Limits</u> |              | <u>Pr &gt; ChiSq</u> | <u>Hazard Ratio</u> | <u>95% Hazard Ratio Confidence Limits</u> |              |
| <u>28-day</u>         |                      |                     |                                           |              |                      |                     |                                           |              |
| <u>2D-SWE</u>         | <u>0.015</u>         | <u>1.048</u>        | <u>1.009</u>                              | <u>1.089</u> | <u>0.0159</u>        | <u>1.075</u>        | <u>1.014</u>                              | <u>1.139</u> |
| <u>MELD</u>           | <u>&lt;.0001</u>     | <u>1.119</u>        | <u>1.066</u>                              | <u>1.176</u> | <u>0.0002</u>        | <u>1.158</u>        | <u>1.073</u>                              | <u>1.251</u> |
| <u>Age</u>            | <u>..</u>            | <u>..</u>           | <u>..</u>                                 | <u>..</u>    | <u>..</u>            | <u>..</u>           | <u>..</u>                                 | <u>..</u>    |
| <u>Platelet count</u> | <u>..</u>            | <u>..</u>           | <u>..</u>                                 | <u>..</u>    | <u>..</u>            | <u>..</u>           | <u>..</u>                                 | <u>..</u>    |
| <u>2-year</u>         |                      |                     |                                           |              |                      |                     |                                           |              |
| <u>2D-SWE</u>         | <u>0.0201</u>        | <u>1.019</u>        | <u>1.003</u>                              | <u>1.035</u> | <u>0.0203</u>        | <u>1.019</u>        | <u>1.003</u>                              | <u>1.035</u> |
| <u>MELD</u>           | <u>0.0004</u>        | <u>1.043</u>        | <u>1.019</u>                              | <u>1.068</u> | <u>0.0003</u>        | <u>1.047</u>        | <u>1.021</u>                              | <u>1.073</u> |
| <u>Age</u>            | <u>..</u>            | <u>..</u>           | <u>..</u>                                 | <u>..</u>    | <u>..</u>            | <u>..</u>           | <u>..</u>                                 | <u>..</u>    |
| <u>Platelets</u>      | <u>..</u>            | <u>..</u>           | <u>..</u>                                 | <u>..</u>    | <u>..</u>            | <u>..</u>           | <u>..</u>                                 | <u>..</u>    |

**Supplementary Table 8. Best cut-off value of SWE and related sensitivity, specificity for mortality**

| Time     | SWE (kPa)           |              |             |             | MELD score          |              |             |             |  |
|----------|---------------------|--------------|-------------|-------------|---------------------|--------------|-------------|-------------|--|
|          | AUC and 95%CI       | Best cut-off | Sensitivity | Specificity | AUC and 95%CI       | Best cut-off | Sensitivity | Specificity |  |
| 28 days  | 0.864 (0.800-0.928) | 25.15        | 100.0%      | 76.3%       | 0.902 (0.821-0.983) | 10           | 100.0%      | 70.4%       |  |
| 90 days  | 0.788 (0.723-0.853) | 16.35        | 94.7%       | 63.3%       | 0.898 (0.852-0.944) | 10           | 94.7%       | 70.8%       |  |
| 6 months | 0.799 (0.750-0.847) | 16.35        | 96.3%       | 63.6%       | 0.889 (0.849-0.929) | 10           | 96.3%       | 71.1%       |  |
| 1 year   | 0.782 (0.734-0.831) | 16.35        | 89.4%       | 64.1%       | 0.800 (0.732-0.869) | 10           | 83.0%       | 71.6%       |  |
| 2 years  | 0.796 (0.759-0.833) | 16.09        | 88.1%       | 74.9%       | 0.788 (0.744-0.832) | 10           | 75.3%       | 72.9%       |  |

**Supplementary Table 9. Best cut-off value of SWE and related sensitivity, specificity, positive predictive value and negative predictive value with different MELD scores**

| Time     | MELD < 10           |              |             |             | MELD ≥ 10           |              |             |             |  |
|----------|---------------------|--------------|-------------|-------------|---------------------|--------------|-------------|-------------|--|
|          | AUC and 95%CI       | Best cut-off | Sensitivity | Specificity | AUC and 95%CI       | Best cut-off | Sensitivity | Specificity |  |
| 28 days  |                     |              |             |             | 0.719 (0.577-0.860) | 25.15        | 100.0       | 49.3        |  |
| 90 days  | 0.822 (0.800-0.844) | 21.03        | 100.0       | 82.2        | 0.599 (0.484-0.714) | 16.35        | 94.4        | 30.6        |  |
| 6 months | 0.822 (0.800-0.844) | 21.03        | 100.0       | 82.0        | 0.608 (0.520-0.695) | 19.69        | 88.5        | 39.2        |  |
| 1 year   | 0.764 (0.590-0.938) | 21.02        | 75.0        | 82.5        | 0.606 (0.529-0.683) | 15.39        | 94.9        | 29.2        |  |
| 2 years  | 0.794 (0.704-0.884) | 19.87        | 70.8        | 81.5        | 0.625 (0.565-0.685) | 15.39        | 94.5        | 31.1        |  |

**Supplementary table 10.** Best cut-off for MELD score and L-SWE of 2-year out-come in compensated patients and decompensated patients, and related sensitivity, specificity, positive predictive value, and negative predictive value.

| <b>Best cut-off of 10 for MELD Score</b> | <b>Value</b> | <b>95% CI</b>    |
|------------------------------------------|--------------|------------------|
| <b>Compensated</b>                       |              |                  |
| Sensitivity                              | 61.54%       | 47.02% to 74.70% |
| Specificity                              | 84.96%       | 82.59% to 87.13% |
| Positive Likelihood Ratio                | 4.09         | 3.15 to 5.31     |
| Negative Likelihood Ratio                | 0.45         | 0.32 to 0.64     |
| Positive Predictive Value                | 17.68%       | 14.20% to 21.80% |
| Negative Predictive Value                | 97.68%       | 96.76% to 98.35% |
| Accuracy                                 | 83.80%       | 81.42% to 85.98% |
| <b>Decompensated</b>                     |              |                  |
| Sensitivity                              | 90.91%       | 78.33% to 97.47% |
| Specificity                              | 32.94%       | 23.13% to 43.98% |
| Positive Likelihood Ratio                | 1.36         | 1.14 to 1.62     |
| Negative Likelihood Ratio                | 0.28         | 0.10 to 0.74     |
| Positive Predictive Value                | 41.24%       | 37.05% to 45.55% |
| Negative Predictive Value                | 87.50%       | 72.38% to 94.92% |
| Accuracy                                 | 52.71%       | 43.74% to 61.56% |
| <b>Best cut-off of 20 kPa for L-SWE</b>  |              |                  |
| <b>Compensated</b>                       |              |                  |
| Sensitivity                              | 68.52%       | 54.45% to 80.48% |
| Specificity                              | 81.63%       | 79.22% to 83.87% |
| Positive Likelihood Ratio                | 3.73         | 2.99 to 4.64     |
| Negative Likelihood Ratio                | 0.39         | 0.26 to 0.57     |
| Positive Predictive Value                | 15.42%       | 12.77% to 18.50% |
| Negative Predictive Value                | 98.15%       | 97.28% to 98.75% |
| Accuracy                                 | 81.02%       | 78.64% to 83.24% |
| <b>Decompensated</b>                     |              |                  |
| Sensitivity                              | 89.13%       | 76.43% to 96.38% |
| Specificity                              | 29.55%       | 20.29% to 40.22% |
| Positive Likelihood Ratio                | 1.27         | 1.07 to 1.50     |
| Negative Likelihood Ratio                | 0.37         | 0.15 to 0.89     |
| Positive Predictive Value                | 39.81%       | 35.84% to 43.91% |
| Negative Predictive Value                | 83.87%       | 68.15% to 92.67% |
| Accuracy                                 | 50.00%       | 41.25% to 58.75% |

**Supplementary table 11.** Univariate and multivariate competing risk (death as competing risk) analysis of SWE with outcome of development of decompensations in 2 years

| Variables        | Univariate |                       | Multivariate |                       |
|------------------|------------|-----------------------|--------------|-----------------------|
|                  | P value    | sHR & 95.0% CI        | P value      | sHR & 95.0% CI        |
| SWE at baseline  | <0.001     | 1.026 (1.020 - 1.031) | <0.001       | 1.020 (1.014 – 1.026) |
| MELD score       | <0.001     | 1.074 (1.052 – 1.096) | 0.028        | 1.036 (1.004 – 1.069) |
| Child-Pugh score | <0.001     | 1.545 (1.417 – 1.684) | 0.001        | 1.272 (1.110 – 1.456) |
| Age              | <0.001     | 1.030 (1.014 – 1.046) | 0.050        | 1.018 (1.000 – 1.035) |

Abbreviations: MELD, model for end-stage liver disease; SWE, shear wave elastography; sHR, sub-Hazard ratio; CI, confidential interval.

**Supplementary table 12. Baseline characteristics of cohort with 2D-SWE and the additional cohort with p-SWE**

|                        | Characteristics                                                         | 2D-SWE cohort (n = 1827)                                       |               | p-SWE cohort (n = 119)                                  |               |                              |
|------------------------|-------------------------------------------------------------------------|----------------------------------------------------------------|---------------|---------------------------------------------------------|---------------|------------------------------|
| At baseline            | Age                                                                     | 55.0 (45.9 - 62.7)                                             |               | 55 (46 - 66)                                            |               |                              |
|                        | Male                                                                    | 1140 (62.4)                                                    |               | 81 (68.1)                                               |               |                              |
|                        | BMI (kg/m <sup>2</sup> )                                                | 26.5 (23.2 - 30.6)                                             |               | 25.2 (21.8 - 29.2)                                      |               |                              |
|                        | <b>Scores</b>                                                           |                                                                |               |                                                         |               |                              |
|                        | MELD score                                                              | 8 (6 - 10)                                                     |               | 10 (8 - 14)                                             |               |                              |
|                        | Child Pugh score                                                        | 5 (5 - 6)                                                      |               | 6 (5 - 8)                                               |               |                              |
|                        | Child Pugh class (A/B/C)                                                | 1334 / 206 / 44 (84.2 / 13.0 / 2.8)                            |               | 74 / 29 / 14 (62.2 / 24.4 / 11.8)                       |               |                              |
|                        | <b>SWE at baseline (kPa)</b>                                            | 11.8 (7.4 - 24.5)                                              |               | 17 (9.7 - 26.8)                                         |               |                              |
|                        | <b>TE at baseline (kPa)</b>                                             | 8.3 (5.7 - 14.0)                                               |               | 23 (14.4 - 39.7)                                        |               |                              |
|                        | <b>Etiology: Alcohol / NAFLD / HCV / HBV / Other or multiple causes</b> | 414 / 389 / 267 / 166 / 310 (26.8 / 25.2 / 17.3 / 10.7 / 20.0) |               | 33 / 25 / 31 / 5 / 25 (27.7 / 21.0 / 26.1 / 4.2 / 21.0) |               |                              |
|                        | <b>Laboratory test</b>                                                  |                                                                |               |                                                         |               |                              |
|                        | Albumin (g/L)                                                           | 40.0 (33.8 - 43.0)                                             |               | 38.9 (34.8 - 42.6)                                      |               |                              |
|                        | Alkaline phosphatase (U/L)                                              | 90.0 (67.0 - 128.0)                                            |               | 89.5 (66.3 - 120.0)                                     |               |                              |
|                        | ALT (U/L)                                                               | 44.9 (28.0 - 77.0)                                             |               | 32 (22 - 51.5)                                          |               |                              |
|                        | AST (U/L)                                                               | 43.0 (30.0 - 69.0)                                             |               | 41 (30 - 58.8)                                          |               |                              |
|                        | Bilirubin (mg/dl)                                                       | 0.8 (0.5 - 1.3)                                                |               | 0.9 (0.6 - 1.6)                                         |               |                              |
|                        | Creatinine (mg/dl)                                                      | 0.8 (0.7 - 1.0)                                                |               | 0.8 (0.6 - 1.1)                                         |               |                              |
|                        | INR                                                                     | 1.1 (1.0 - 1.2)                                                |               | 1.2 (1.1 - 1.4)                                         |               |                              |
|                        | Platelets (G/l)                                                         | 179.0 (122.0 - 242.0)                                          |               | 120.5 (86 - 168.3)                                      |               |                              |
|                        | WBC (×10 <sup>9</sup> /L)                                               | 6.2 (5.0 - 7.9)                                                |               | 5.4 (3.8 - 6.6)                                         |               |                              |
|                        | CRP                                                                     | 2.9 (1.1 - 7.0)                                                |               | 0.4 (0.1 - 0.8)                                         |               |                              |
|                        | <b>Clinical complications</b>                                           |                                                                |               |                                                         |               |                              |
|                        | Absent from alcohol drinking                                            | 1394 (76.3)                                                    |               | 105 (88.2)                                              |               |                              |
|                        | HCV SVR before SWE                                                      | 81 (16.8)                                                      |               | 21 (17.6)                                               |               |                              |
|                        | Ascites (absent / mild / tense)                                         | 1574 / 134 / 107 (86.7 / 7.4 / 5.9)                            |               | 81 / 29 / 8 (68.1 / 24.4 / 6.7)                         |               |                              |
|                        | Hepatic encephalopathy (Grade 0 / 1 / 2 / 3)                            | 1262 / 172 / 44 / 6 (85.0 / 11.6 / 3.0 / 0.4)                  |               | 77 / 25 / 15 / 1 (64.7 / 21.0 / 12.6 / 0.8)             |               |                              |
|                        | Previous variceal bleeding                                              | 113 (6.9)                                                      |               | 13 (10.9)                                               |               |                              |
|                        | Previous bacterial infection                                            | 99 (6.0)                                                       |               | 10 (8.4)                                                |               |                              |
|                        | Previous hepatorenal syndrome                                           | 51 (3.1)                                                       |               | 6 (5.0)                                                 |               |                              |
|                        | Follow-up                                                               | <b>Had decompensation episodes</b>                             | <b>2-year</b> | <b>Till end of follow-up</b>                            | <b>2-year</b> | <b>Till end of follow-up</b> |
| Ascites                |                                                                         | 73 (4.0)                                                       | 132 (7.2)     | 6 (5.0)                                                 | 8 (6.7)       |                              |
| Bacterial infection    |                                                                         | 71 (3.9)                                                       | 159 (8.7)     | 26 (21.8)                                               | 28 (23.5)     |                              |
| Hepatic encephalopathy |                                                                         | 48 (2.6)                                                       | 93 (5.1)      | 19 (16.0)                                               | 27 (22.7)     |                              |
| Hepatorenal syndrome   |                                                                         | 25 (1.4)                                                       | 44 (2.4)      | 8 (6.7)                                                 | 9 (7.6)       |                              |
| Variceal bleeding      |                                                                         | 21 (1.1)                                                       | 36 (2.0)      | 4 (3.4)                                                 | 4 (3.4)       |                              |

**Supplementary table 13.** Baseline characteristics of compensated patients and randomly selected into 2/3 of derivation group and 1/3 of internal validation group

| <b><u>Baseline characteristics</u></b>          | <b><u>Derivation in compensated (n=1041)</u></b> | <b><u>Internal validation in compensated (n=519)</u></b> | <b><u>p value</u></b> |
|-------------------------------------------------|--------------------------------------------------|----------------------------------------------------------|-----------------------|
| <u>Age</u>                                      | <u>54 (44 - 61.8)</u>                            | <u>55.1 (44.3 - 64)</u>                                  | <u>0.019</u>          |
| <u>Male gender</u>                              | <u>637 (61.2)</u>                                | <u>325 (62.6)</u>                                        | <u>0.600</u>          |
| <u>BMI (kg/m<sup>2</sup>)</u>                   | <u>26.5 (23.1 - 31)</u>                          | <u>26.9 (23.5 - 30.7)</u>                                | <u>0.937</u>          |
| <u>SWE (kPa)</u>                                | <u>8.8 (5.8 - 15.5)</u>                          | <u>10.3 (7 - 17.4)</u>                                   | <u>0.185</u>          |
| <u>TE (kPa)</u>                                 | <u>8.9 (5.9 - 15.6)</u>                          | <u>9.5 (6.9 - 17.2)</u>                                  | <u>0.509</u>          |
| <b><u>Etiology</u></b>                          |                                                  |                                                          | <u>0.501</u>          |
| <u>NAFLD</u>                                    | <u>248 (23.8)</u>                                | <u>127 (24.5)</u>                                        |                       |
| <u>Alcohol</u>                                  | <u>214 (20.6)</u>                                | <u>113 (21.8)</u>                                        |                       |
| <u>HCV</u>                                      | <u>156 (15)</u>                                  | <u>62 (11.9)</u>                                         |                       |
| <u>HBV</u>                                      | <u>99 (9.5)</u>                                  | <u>48 (9.2)</u>                                          |                       |
| <u>Other causes</u>                             | <u>195 (18.7)</u>                                | <u>95 (18.4)</u>                                         |                       |
| <u>Multiple causes</u>                          | <u>8 (0.8)</u>                                   | <u>2 (0.4)</u>                                           |                       |
| <b><u>Scores for chronic liver diseases</u></b> |                                                  |                                                          |                       |
| <u>MELD score</u>                               | <u>7 (6 - 9)</u>                                 | <u>7 (6 - 9)</u>                                         | <u>0.698</u>          |
| <u>Child-pugh score</u>                         | <u>5 (5 - 5)</u>                                 | <u>5 (5 - 5)</u>                                         | <u>0.346</u>          |
| <u>Child-pugh class</u>                         |                                                  |                                                          | <u>0.717</u>          |
| <u>A</u>                                        | <u>871 (83.7)</u>                                | <u>434 (83.6)</u>                                        |                       |
| <u>B</u>                                        | <u>57 (5.5)</u>                                  | <u>26 (5.0)</u>                                          |                       |
| <b><u>Laboratory data</u></b>                   |                                                  |                                                          |                       |
| <u>Albumin (g/l)</u>                            | <u>41 (37 - 44)</u>                              | <u>41 (37 - 43.2)</u>                                    | <u>0.785</u>          |
| <u>Bilirubin (mg/dl)</u>                        | <u>0.7 (0.5 - 1.1)</u>                           | <u>0.7 (0.5 - 1.1)</u>                                   | <u>0.296</u>          |
| <u>Creatinine (mg/dl)</u>                       | <u>0.8 (0.7 - 1)</u>                             | <u>0.8 (0.7 - 1)</u>                                     | <u>0.421</u>          |
| <u>INR</u>                                      | <u>1.0 (1.0 - 1.1)</u>                           | <u>1.0 (1.0 - 1.2)</u>                                   | <u>0.367</u>          |
| <u>Platelets (G/l)</u>                          | <u>193 (141 - 249.8)</u>                         | <u>190.5 (139.3 - 251)</u>                               | <u>0.736</u>          |
| <u>WBC (×10<sup>9</sup>/l)</u>                  | <u>6.2 (5.1 - 7.8)</u>                           | <u>6.2 (4.9 - 7.9)</u>                                   | <u>0.686</u>          |
| <u>usCRP</u>                                    | <u>2.2 (0.9 - 5.1)</u>                           | <u>2.4 (0.9 - 6.6)</u>                                   | <u>0.292</u>          |
| <b><u>Hemodynamic data</u></b>                  |                                                  |                                                          |                       |
| <u>Pulse (bpm)</u>                              | <u>68 (60 - 80)</u>                              | <u>65 (60 - 76)</u>                                      | <u>0.588</u>          |
| <u>MAP (mmHg)</u>                               | <u>79.8 (70 - 92.7)</u>                          | <u>89.3 (78.3 - 96.0)</u>                                | <u>0.118</u>          |
| <b><u>Scores for fibrosis or cirrhosis</u></b>  |                                                  |                                                          |                       |
| <u>ALBI</u>                                     | <u>-2.8 (-3 - -2.2)</u>                          | <u>-2.7 (-3 - -2.2)</u>                                  | <u>0.690</u>          |
| <u>FIB-4</u>                                    | <u>1.6 (1 - 2.8)</u>                             | <u>1.8 (1.1 - 3.2)</u>                                   | <u>0.019</u>          |
| <u>APRI</u>                                     | <u>0.5 (0.3 - 0.9)</u>                           | <u>0.5 (0.3 - 1)</u>                                     | <u>0.164</u>          |



**Supplementary table 14.** Baseline characteristics of decompensated patients and randomly selected into 2/3 of derivation group and 1/3 of internal validation group

| <b>Baseline characteristics</b>          | <b>Derivation in decompensated (n=257)</b> | <b>Internal validation in decompensated (n=129)</b> | <b>p value</b> |
|------------------------------------------|--------------------------------------------|-----------------------------------------------------|----------------|
| <b>Male</b>                              | 178 (69.3)                                 | 81 (62.8)                                           | 0.202          |
| <b>Age</b>                               | 57.2 (50.4 - 64)                           | 58.3 (52.4 - 65)                                    | 0.119          |
| <b>BMI (kgm<sup>2</sup>)</b>             | 25.3 (22.5 - 29.1)                         | 26.5 (23 - 30.4)                                    | 0.195          |
| <b>Mean value of SWE</b>                 | 28.7 (19.1 - 40.5)                         | 30.2 (19.2 - 43.9)                                  | 0.292          |
| <b>Median value of TE</b>                | 36.1 (26.6 - 46.9)                         | 61.6 (31.2 - 75)                                    | 0.021          |
| <b>Etiology</b>                          |                                            |                                                     | 0.517          |
| Alcohol                                  | 78 (30.4)                                  | 42 (32.6)                                           |                |
| HCV                                      | 55 (21.4)                                  | 25 (19.4)                                           |                |
| NAFLD                                    | 23 (8.9)                                   | 16 (12.4)                                           |                |
| HBV                                      | 17 (6.6)                                   | 7 (5.4)                                             |                |
| Other causes                             | 25 (9.7)                                   | 9 (7)                                               |                |
| Multiple causes                          | 0 (0.0)                                    | 1 (0.8)                                             |                |
| <b>Scores for chronic liver diseases</b> |                                            |                                                     |                |
| MELD                                     | 13 (9 - 17)                                | 12.5 (9.8 - 17)                                     | 0.662          |
| Child-pugh                               | 8 (6 - 9)                                  | 8 (6 - 9)                                           | 0.785          |
| Child-pugh class                         |                                            |                                                     | 0.897          |
| A                                        | 69 (26.8)                                  | 36 (27.9)                                           |                |
| B                                        | 100 (38.9)                                 | 52 (40.3)                                           |                |
| C                                        | 40 (15.6)                                  | 18 (14)                                             |                |
| <b>Laboratory data</b>                   |                                            |                                                     |                |
| Albumin (g/l)                            | 31.5 (26 - 37)                             | 32.5 (25.2 - 37)                                    | 0.913          |
| Bilirubin (mg/dl)                        | 1.6 (1 - 3.1)                              | 1.5 (0.9 - 3.2)                                     | 0.248          |
| Creatinine (mg/dl)                       | 0.8 (0.7 - 1.1)                            | 0.8 (0.7 - 1.2)                                     | 0.614          |
| INR                                      | 1.4 (1.2 - 1.6)                            | 1.3 (1.2 - 1.5)                                     | 0.337          |
| Platelets (G/l)                          | 98 (70 - 144)                              | 102 (72.5 - 145.5)                                  | 0.836          |
| WBC (×10 <sup>9</sup> /l)                | 6.1 (4.2 - 8.1)                            | 5.7 (4.1 - 7.3)                                     | 0.477          |
| usCRP                                    | 10.3 (5.8 - 30.7)                          | 9.5 (4 - 27.6)                                      | 0.298          |
| <b>Hemodynamic data</b>                  |                                            |                                                     |                |
| Pulse (bpm)                              | 72 (64 - 79)                               | 64 (62 - 78)                                        | 0.256          |
| MAP (mmHg)                               | 82.3 (73.3 - 90.3)                         | 81.7 (75 - 90.8)                                    | 0.732          |
| <b>Scores for fibrosis or cirrhosis</b>  |                                            |                                                     |                |
| ALBI                                     | -1.6 (-2.2 - -1.1)                         | -1.6 (-2.3 - -0.9)                                  | 0.738          |
| FIB-4                                    | 5.1 (3.1 - 8.5)                            | 5.3 (3.2 - 8.8)                                     | 0.882          |
| APRI                                     | 1.4 (0.7 - 2.4)                            | 1.2 (0.8 - 2.4)                                     | 0.838          |

---

**Supplementary table 15. Multivariate analysis of TE and MELD score of 2-year mortality.**

| <b>Parameter</b> | <b>Chi-Square</b> | <b>Pr &gt; ChiSq</b> | <b>Hazard Ratio</b> | <b>95% Hazard Ratio Confidence Limits</b> |       |
|------------------|-------------------|----------------------|---------------------|-------------------------------------------|-------|
| <b>TE (kPa)</b>  | 16.8366           | <.0001               | 1.038               | 1.02                                      | 1.056 |
| <b>MELD</b>      | 10.2248           | 0.0014               | 1.198               | 1.073                                     | 1.339 |

**Supplementary figure 1. Flow chart of the 2D-SWE and additional p-SWE cohort**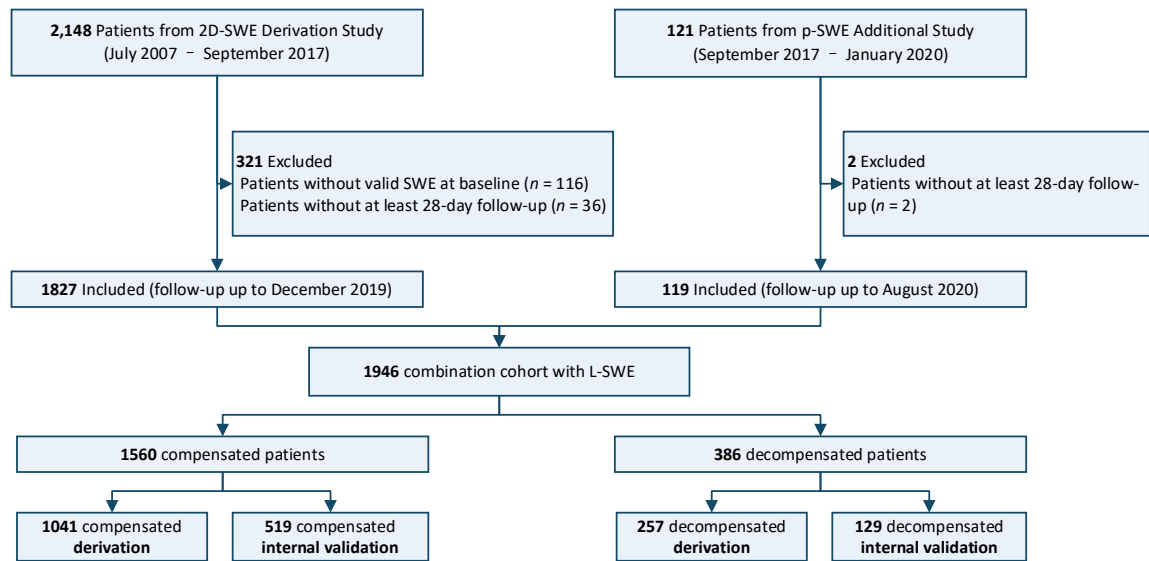

**Supplementary figure 2.** Violin plot of L-SWE measurements of each participated center.

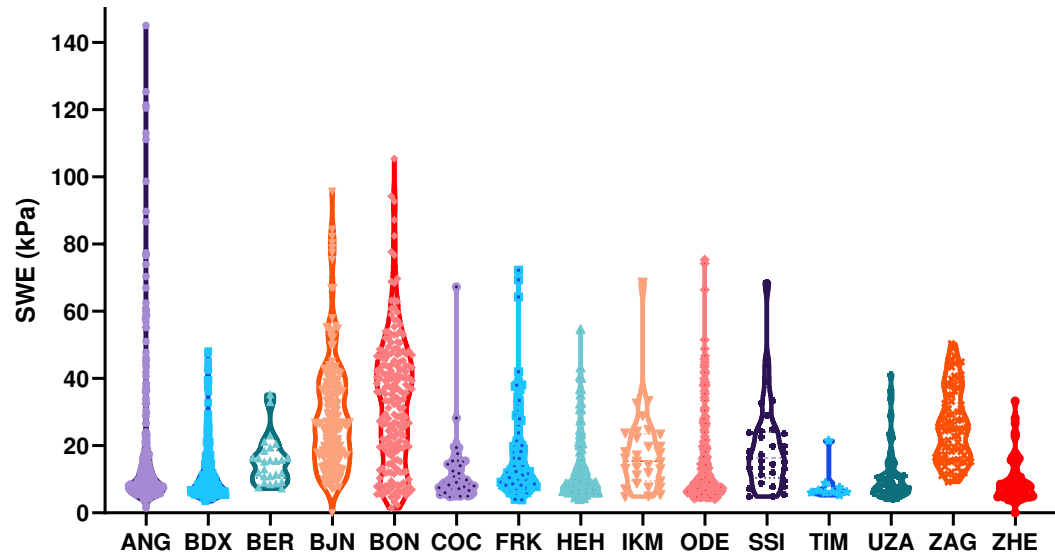

**Supplementary Figure 3.** ROC curve of combination of SWE and MELD, SWE, ALBI score, FIB-4 score and APRI score. Panel A. ROC curve of mortality; Panel B. ROC curve of decompensations. Panel C, D and E. Time-dependent area under the curve of APRI, FIB4 and ALBI score in the outcome of mortality

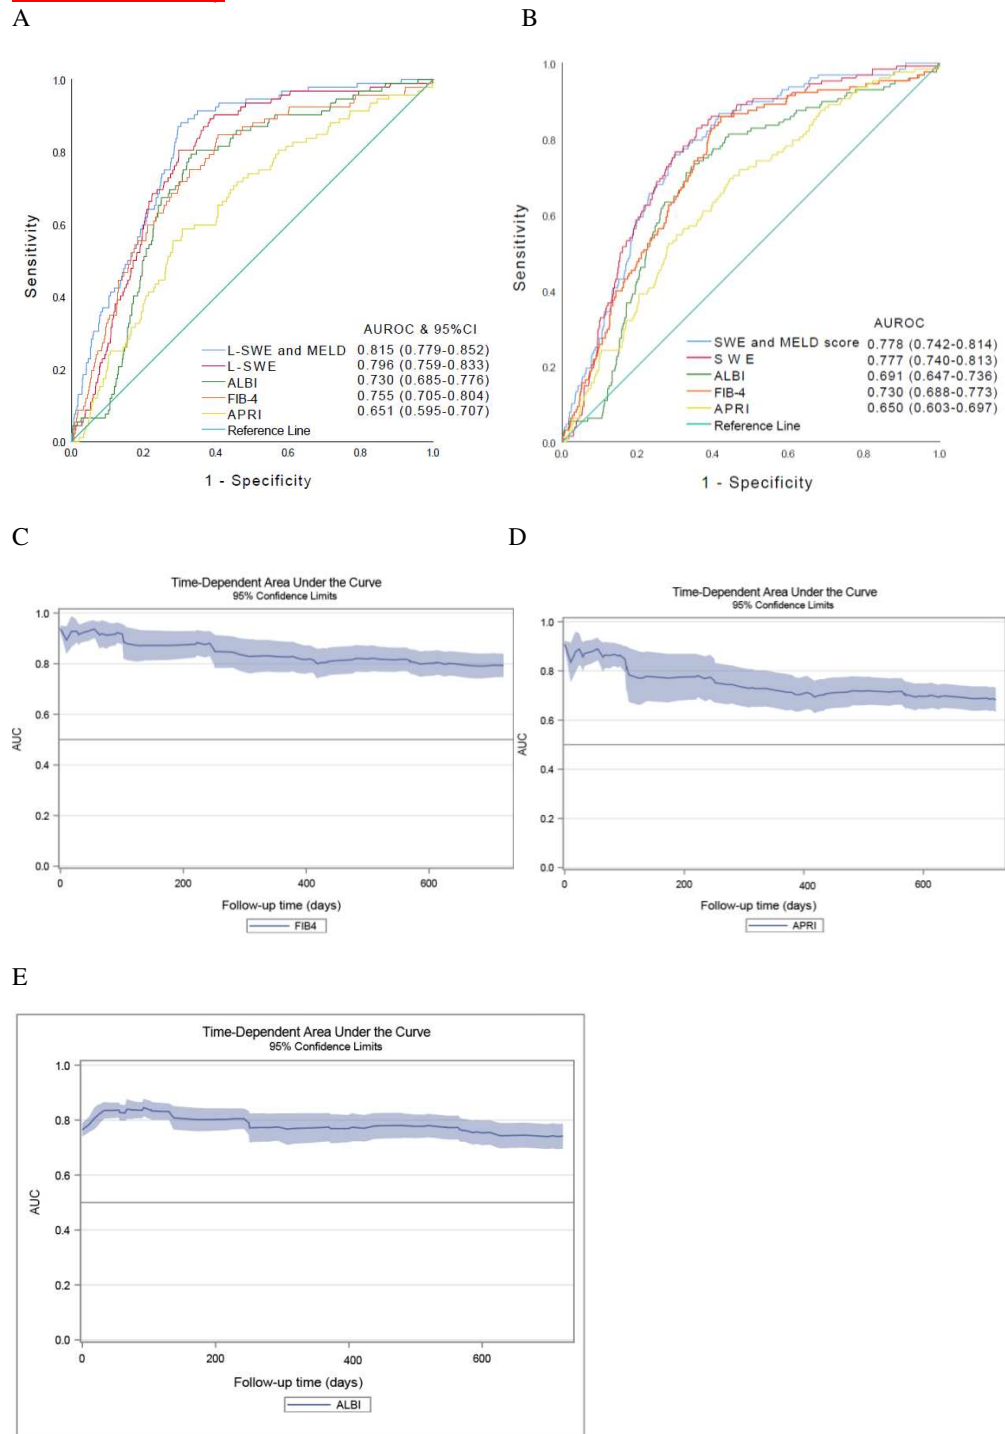

**Supplementary Figure 4.** Panel A. ROC curve of combination of SWE and MELD, SWE, MELD score and Child-Pugh score in prediction of mortality. Panel B. Calibration plot of MELD score and SWE combined with MELD score. Panel C. Kaplan Meier curve of patients with MELD score < 10, comparison between SWE > 20 kPa < 20 kPa; Panel D. Kaplan Meier curve of patients with MELD score > 10, comparison between SWE > 20 kPa and < 20 kPa

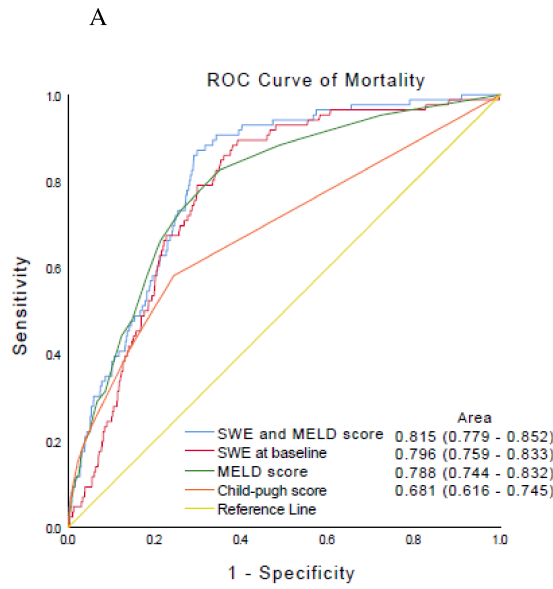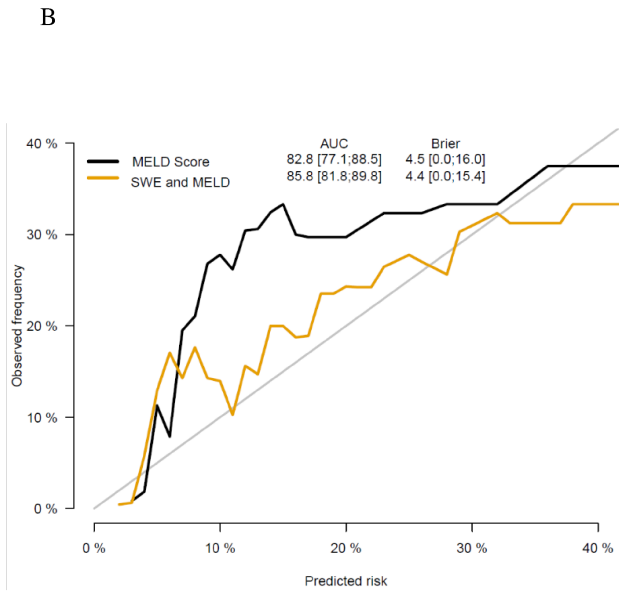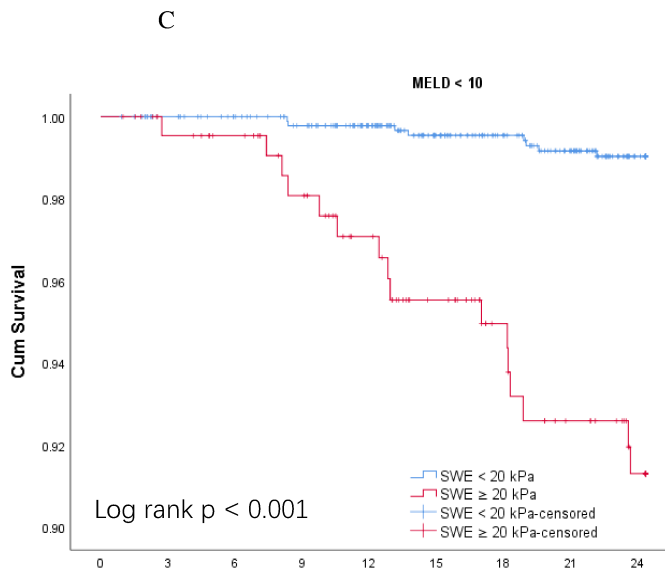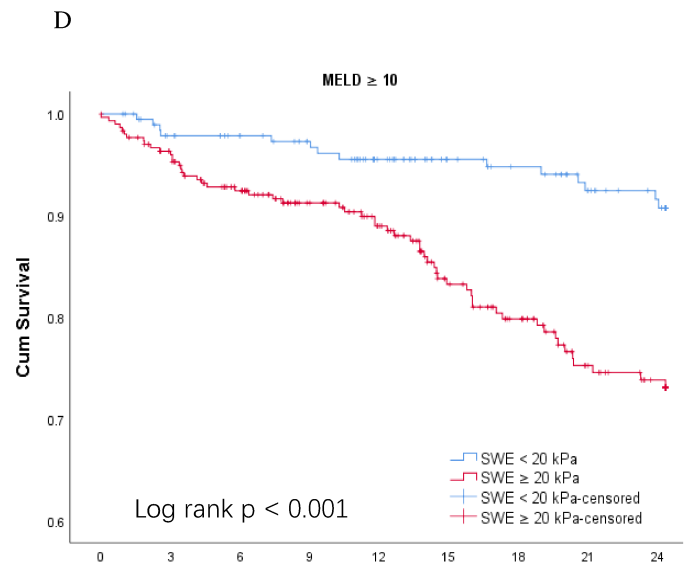

| Patients at risk | Follow-up time (Months) |     |     |     | Patients at risk |
|------------------|-------------------------|-----|-----|-----|------------------|
|                  | 0                       | 3   | 6   | 9   |                  |
| SWE < 20 kPa     | 943                     | 920 | 870 | 794 | 713              |
| SWE ≥ 20 kPa     | 222                     | 210 | 190 | 160 | 141              |

| Patients at risk | Follow-up time (Months) |     |     |     | Patients at risk |
|------------------|-------------------------|-----|-----|-----|------------------|
|                  | 0                       | 3   | 6   | 9   |                  |
| SWE > 20 kPa     | 193                     | 173 | 151 | 126 | 105              |
| SWE ≥ 20 kPa     | 305                     | 246 | 187 | 134 | 97               |

**Supplementary figure 5.** Panel A. Density curve of patients died days during 2-year of follow-up. The length of follow-up days of each group was described as median and interquartile range. Panel B. Density curve of L-SWE distribution of patients with good, intermediate and poor prognosis. The L-SWE value of each group was described as median and interquartile range.

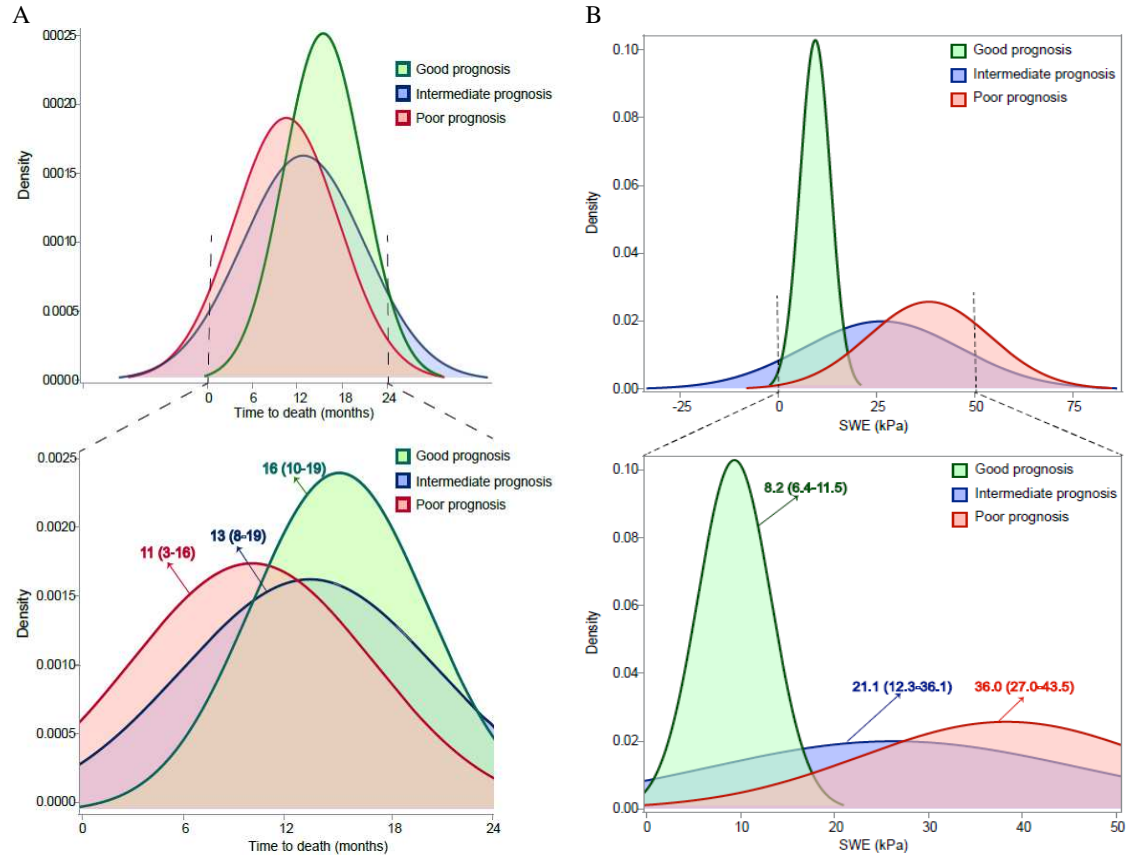

**Supplementary Figure 6.** Panel A. ROC curve of decompensation development; Panel B. Cumulative incidence of decompensation in patients with MELD score < 10, comparison between SWE > 20 kPa and < 20 kPa; Panel C. Cumulative incidence of decompensation in patients with MELD score > 10, comparison between SWE > 20 kPa and < 20 kPa;

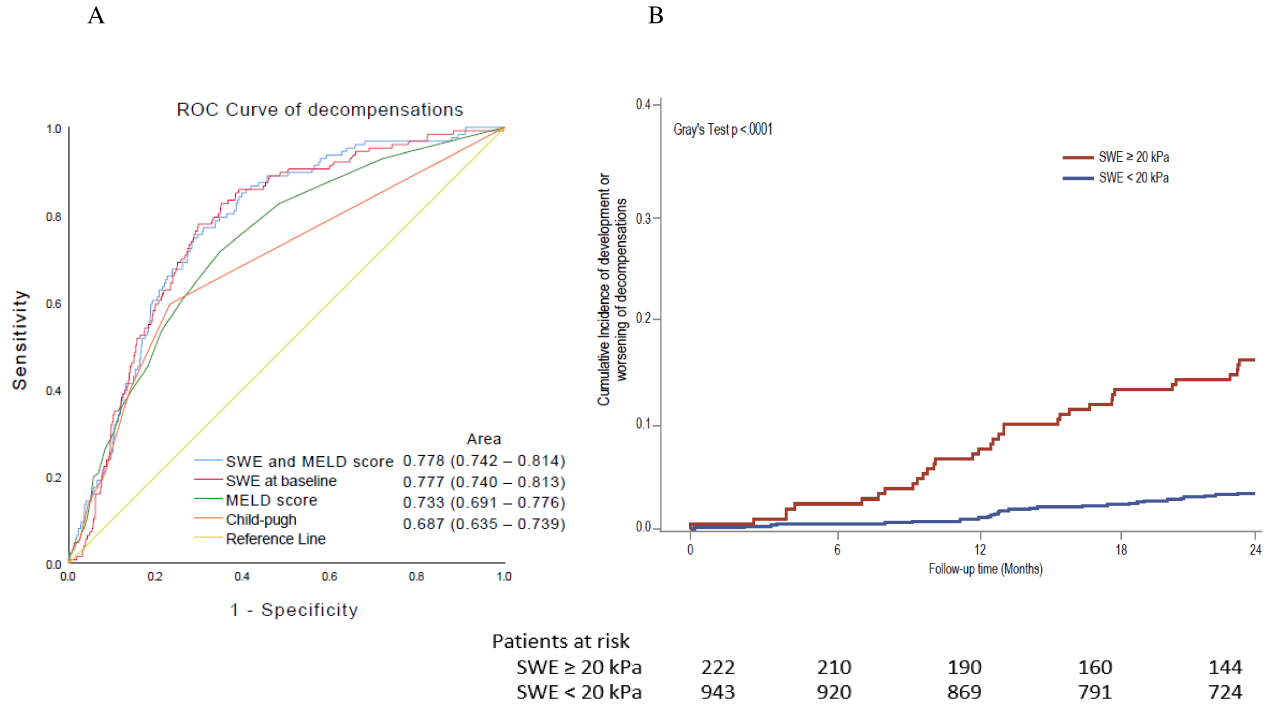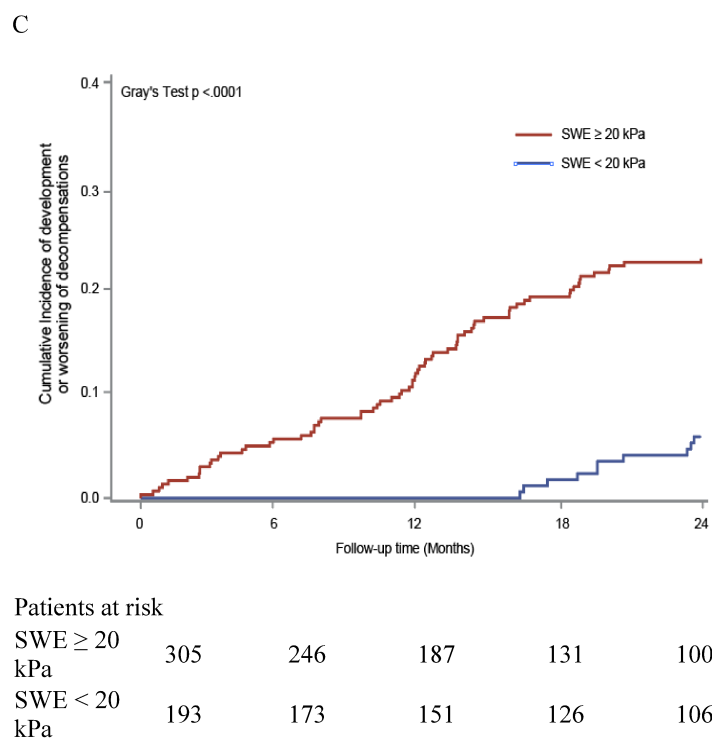



**Supplementary Figure 7.** Cumulative incidence of development of Panel A ascites (death as competing risk), Panel B, hepatic encephalopathy (death as competing risk) over two years in patients with good, intermediate and poor prognosis.

A

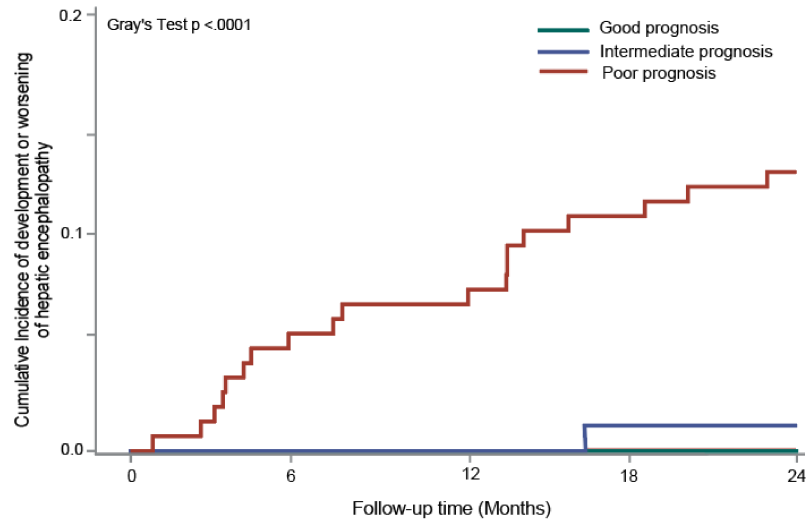

| Patients at risk       |     |     |     |     |     |
|------------------------|-----|-----|-----|-----|-----|
| Good prognosis         | 943 | 927 | 916 | 878 | 853 |
| Intermediate prognosis | 415 | 412 | 403 | 388 | 377 |
| Poor prognosis         | 305 | 305 | 304 | 301 | 297 |

B

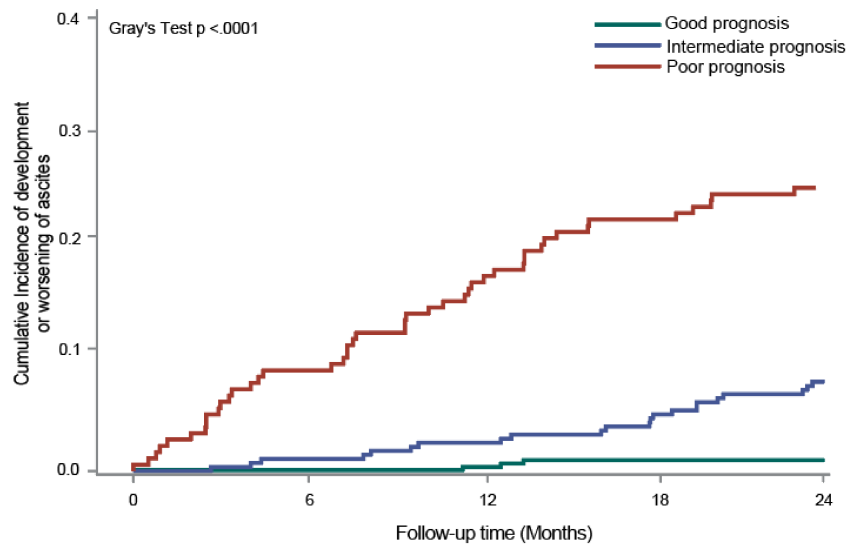

| Patients at risk       |     |     |     |     |     |
|------------------------|-----|-----|-----|-----|-----|
| Good prognosis         | 943 | 920 | 869 | 791 | 725 |
| Intermediate prognosis | 415 | 383 | 341 | 286 | 251 |
| Poor prognosis         | 305 | 246 | 187 | 134 | 100 |

**Supplementary figure 8** Panel A. Calibration plot of the SWE and MELD in the mortality outcome prediction of validation cohort; Panel B. ROC curve of MELD score and SWE combined with MELD score in prediction 2-year mortality of validation cohort

**A.**

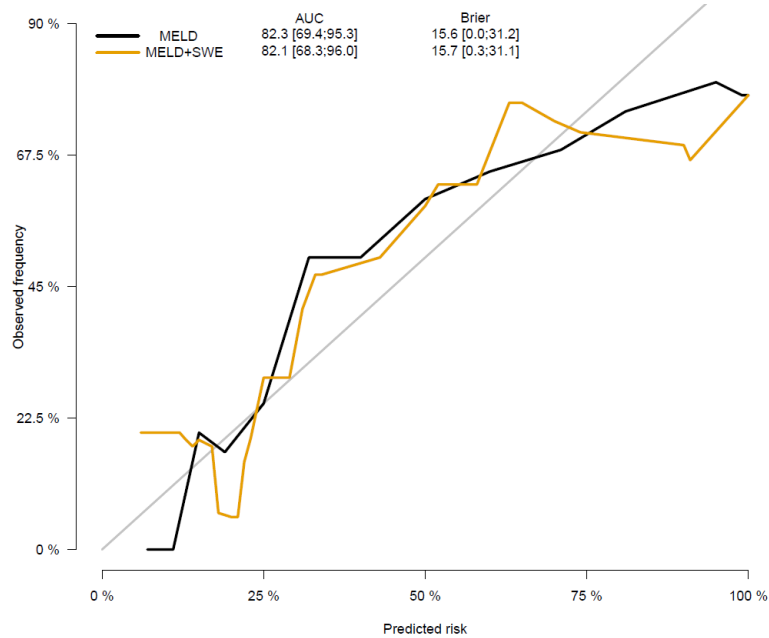

**B**

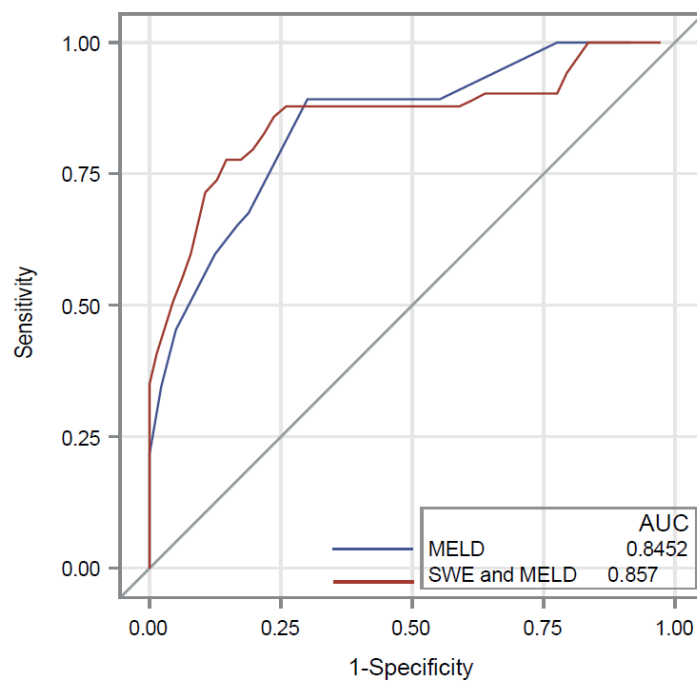

Supplementary figure 9. Panel A. Decision tree of the cohort with 2D-SWE. Panel B. Decision tree of the additional cohort with p-SWE

A

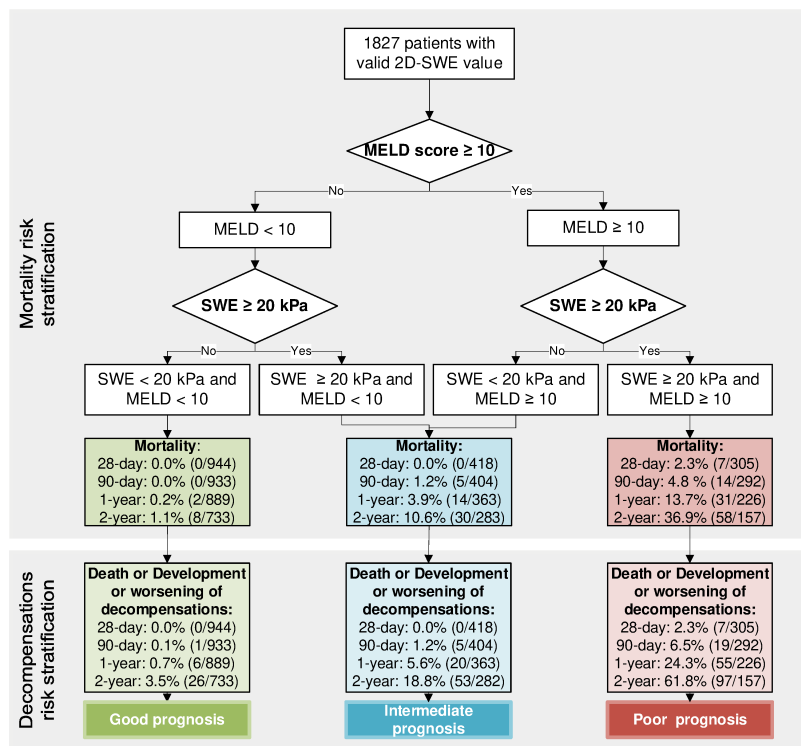

B

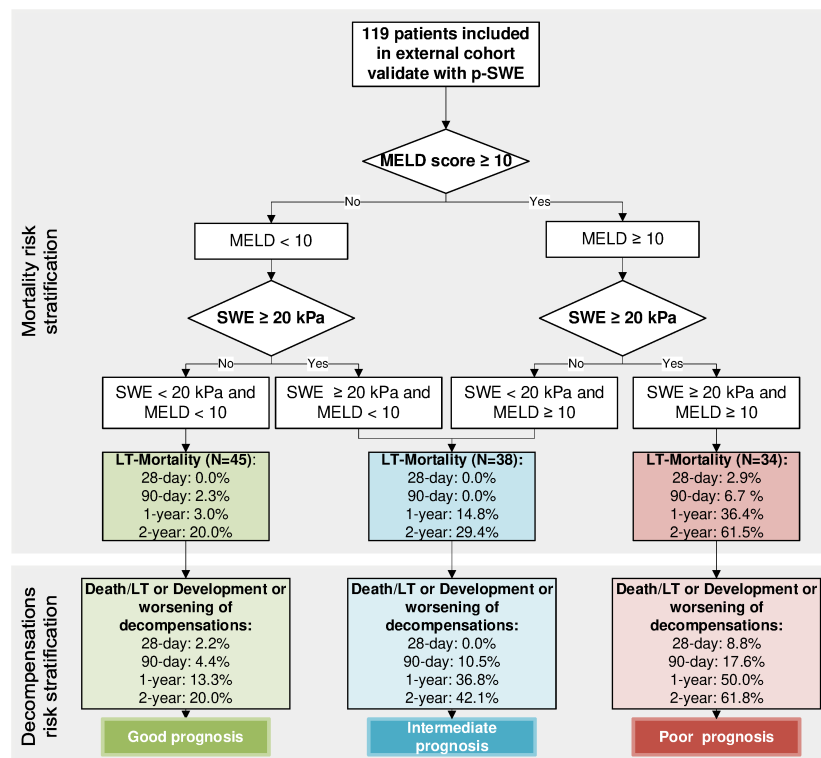

**Supplementary figure 10.** Kaplan Meier curve of 2-year survival in compensated patients randomly selected into derivation and internal validation groups

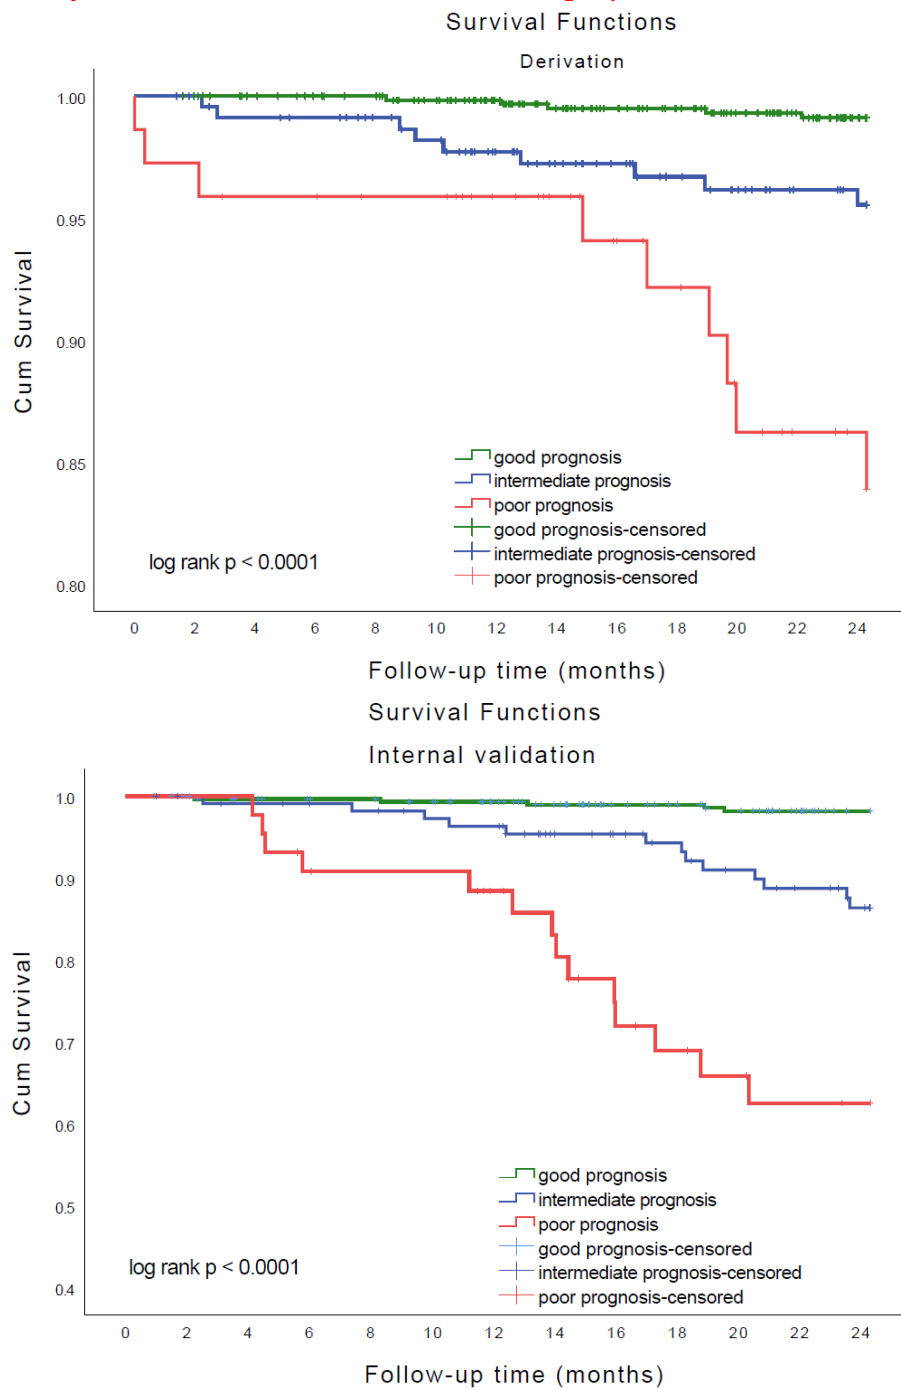

**Supplementary figure 11.** Kaplan Meier curve of 2-year survival in decompensated patients randomly selected into derivation and internal validation groups

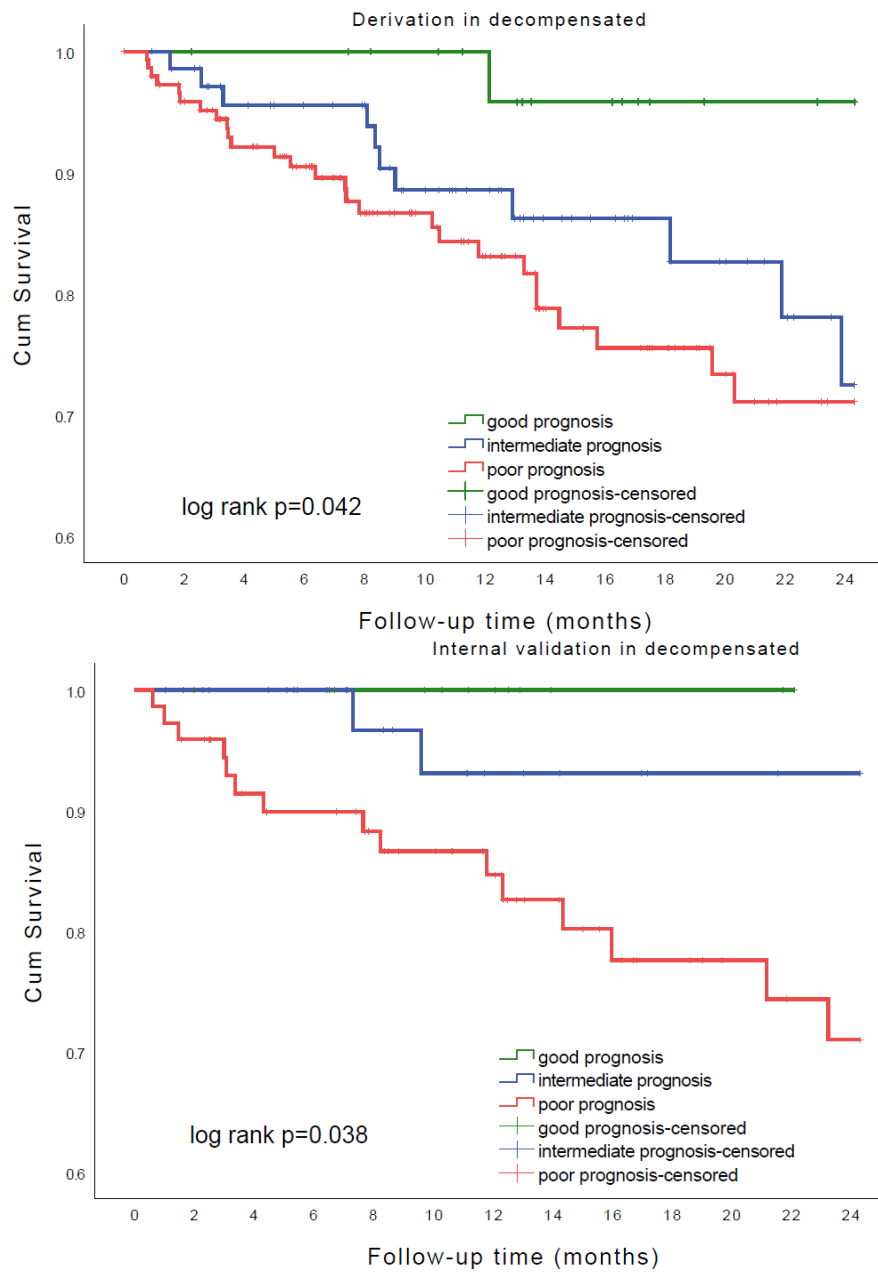

**Supplementary figure 12.** Panel A. Time-dependent area under the curve of TE and SWE. Panel B. Time-dependent area under the curve of TE combined with MELD score and SWE combined with MELD score.

**A**

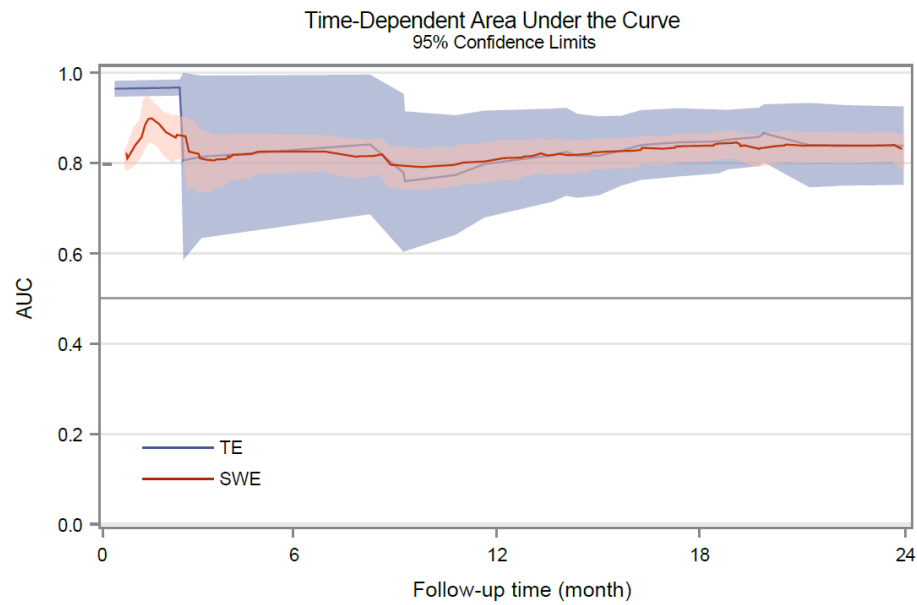

**B**

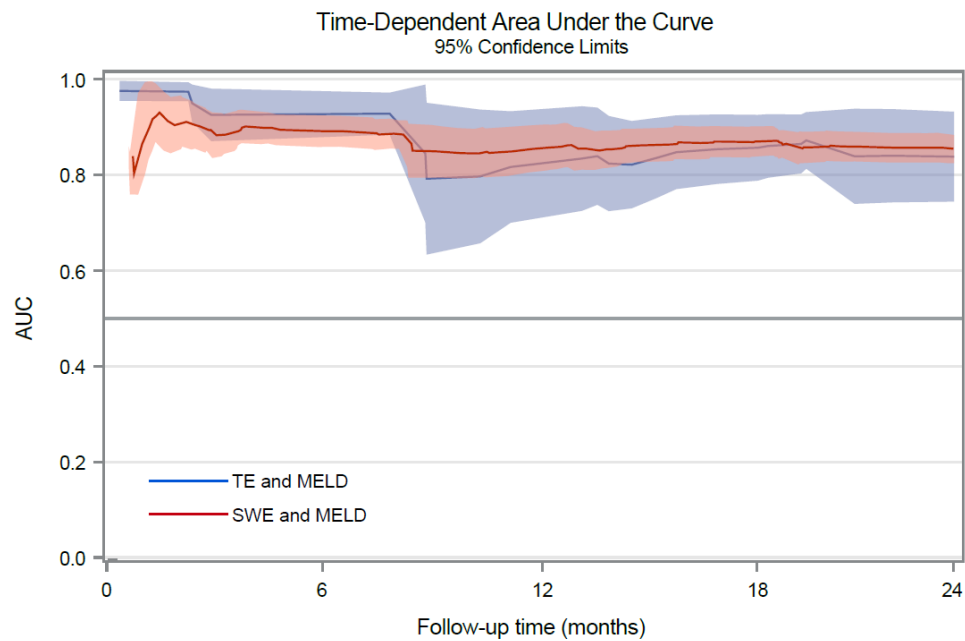

**Supplementary figure 13.** Panel A. ROC curve of TE in the outcome prediction and compared with other models. Panel B. Kaplan Meier curve of patients with MELD lower than 10, compared by TE lower and greater than 20kPa; Panel C. Kaplan Meier curve of patients with MELD equal and higher than 10, compared by TE lower and greater than 20kPa; Panel D. Kaplan Meier curve of patients with TE lower or greater than 20kPa, combined with MELD lower or greater than 10.

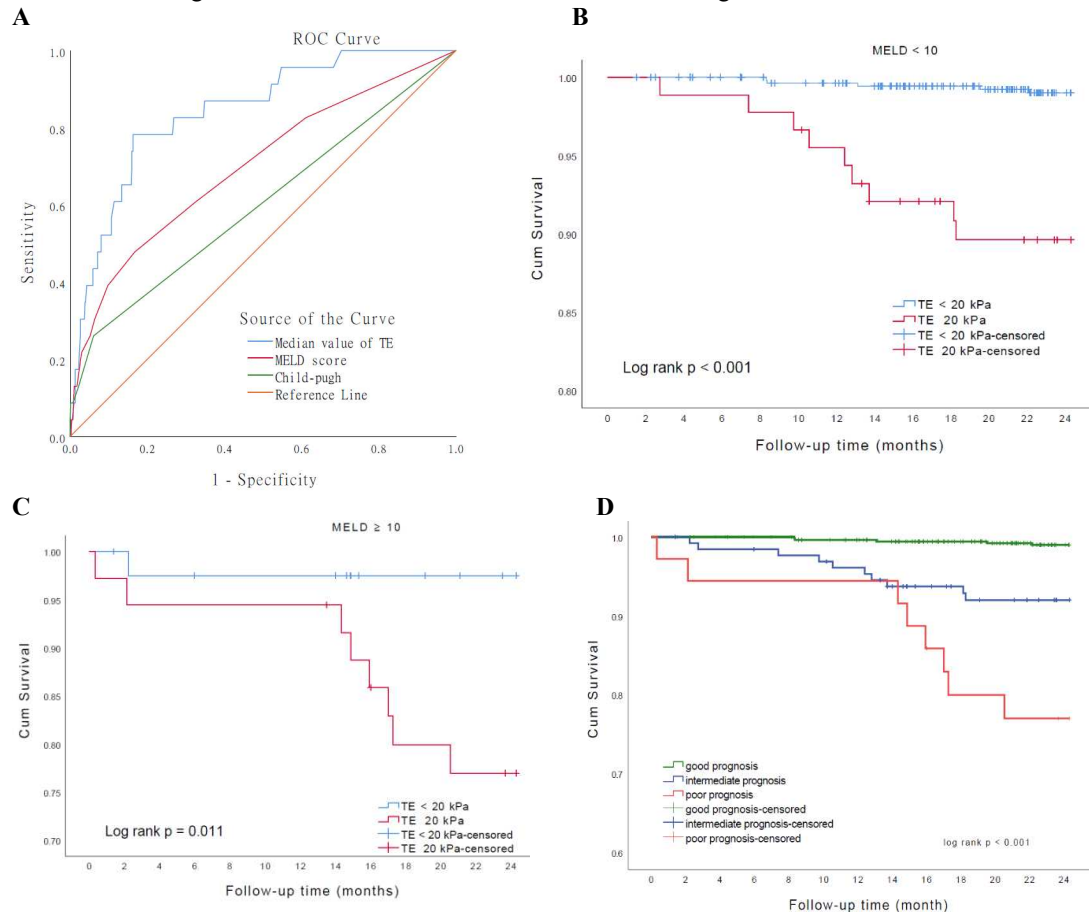

**Supplementary figure 14.** Etiology sensitive analysis of Kaplan Meier survival curve in different causes of chronic liver disease, compared among different prognosis groups. Panel A. in alcohol-related chronic liver diseases; Panel B. in HCV; Panel C. in HBV; Panel D. in NAFLD; Panel E. in other causes.

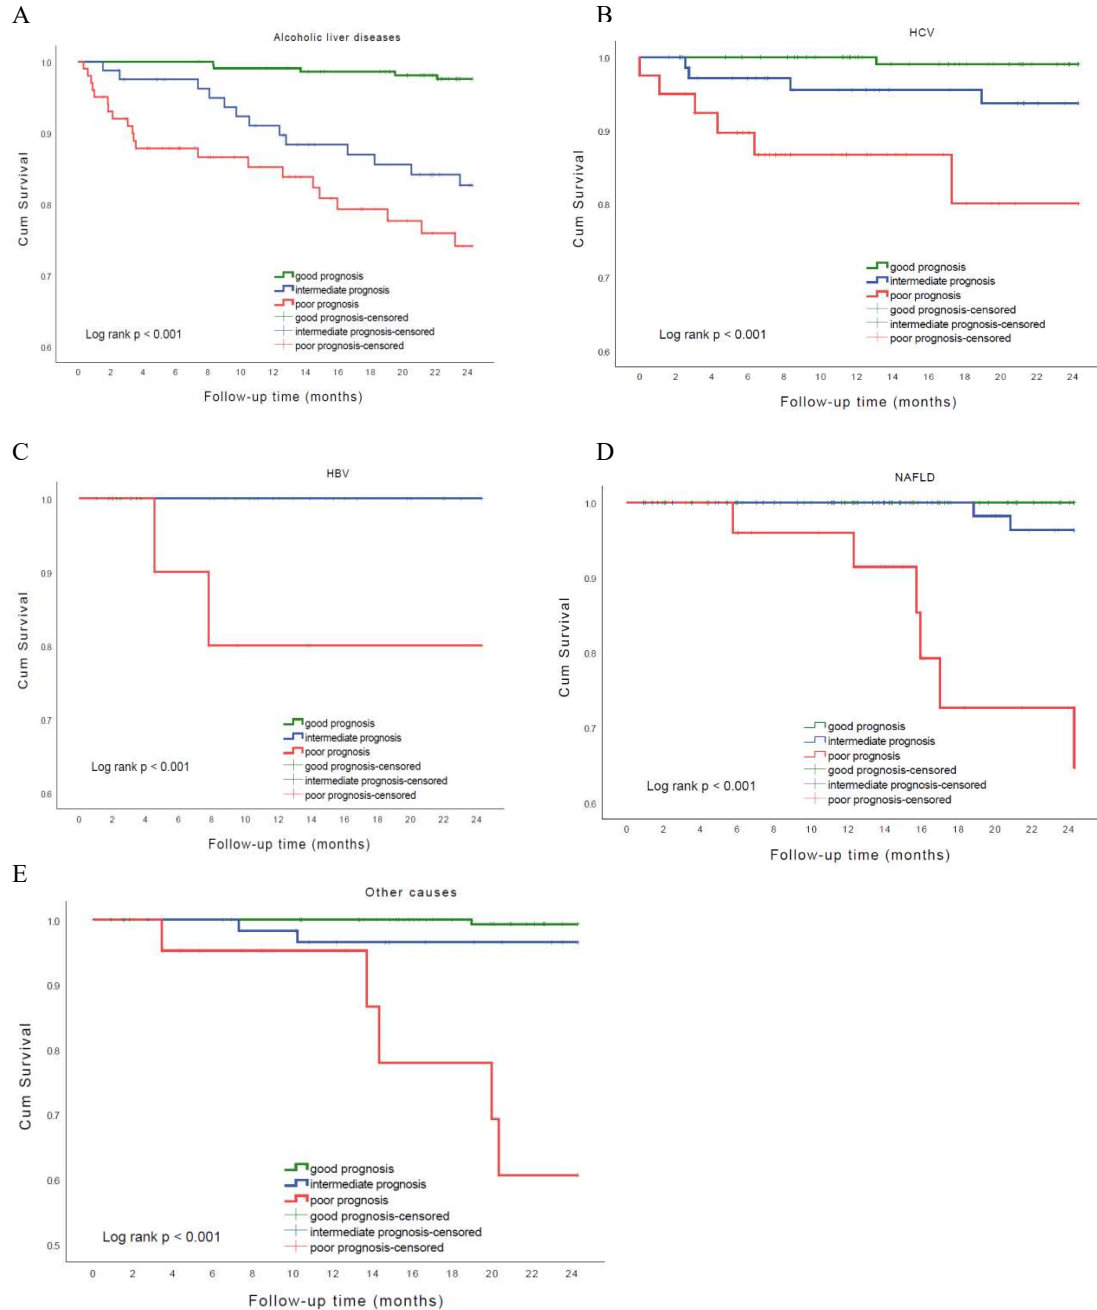



**Supplementary figure 15.** Center sensitivity analysis. Panel A. ROC curve in South Europe of 2-year mortality; Panel B. ROC curve in North Europe of 2-year mortality. Panel C. Kaplan Meier curve of South Europe in three group of different prognoses; Panel D. Kaplan Meier curve of North Europe in three group of different prognoses

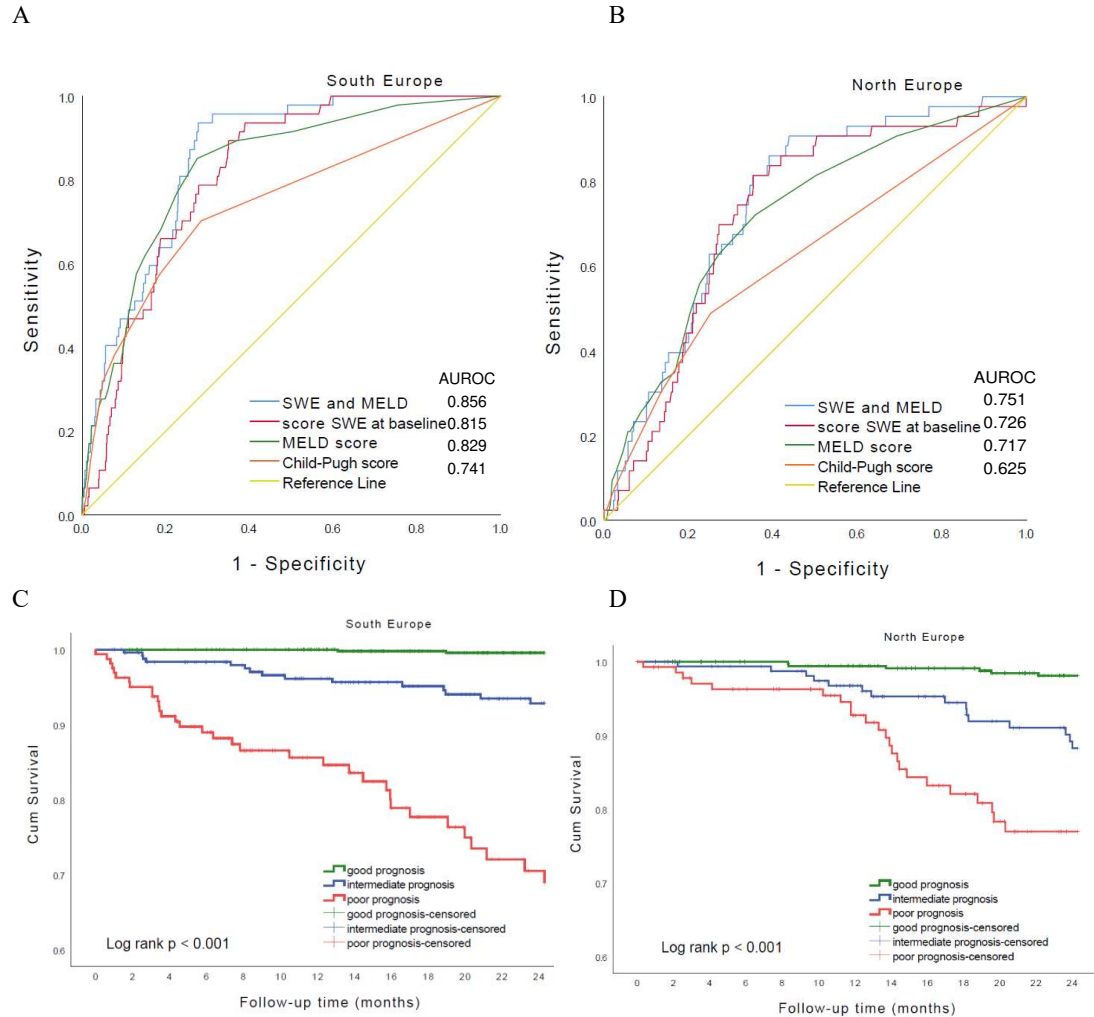

**Supplementary figure 16.** Panel A. Histogram of date distribution of the SWE measurement of patients included from all participated centers; Panel B. Survival function curve of patients included from year 2007 to year 2012; Panel C. Survival function curve of patients included from year 2013 to year 2016; Panel D. Survival function curve of patients included from year 2017 to year 2020

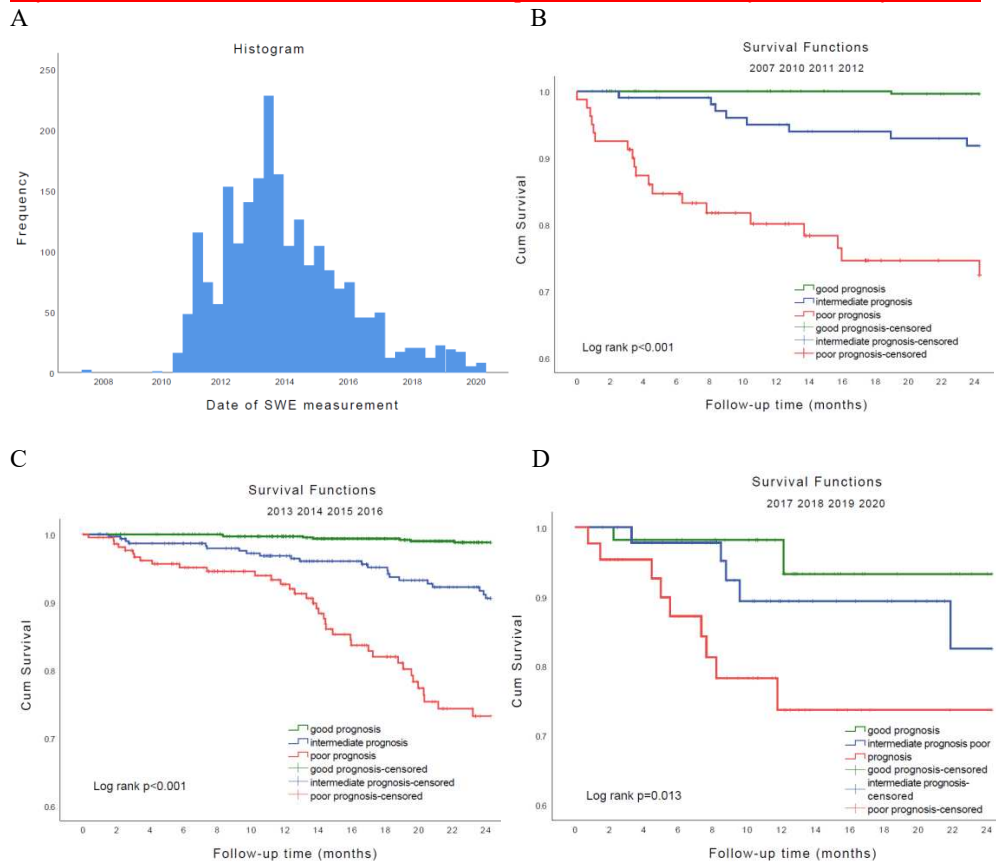

**Supplementary figure 17.** Panel A. River diagram of dynamic changes at baseline and during follow-up of the patients with good prognosis, intermediate prognosis and poor prognosis; Panel B. Distribution of the follow-up time of patients with good prognosis, intermediate prognosis and poor prognosis

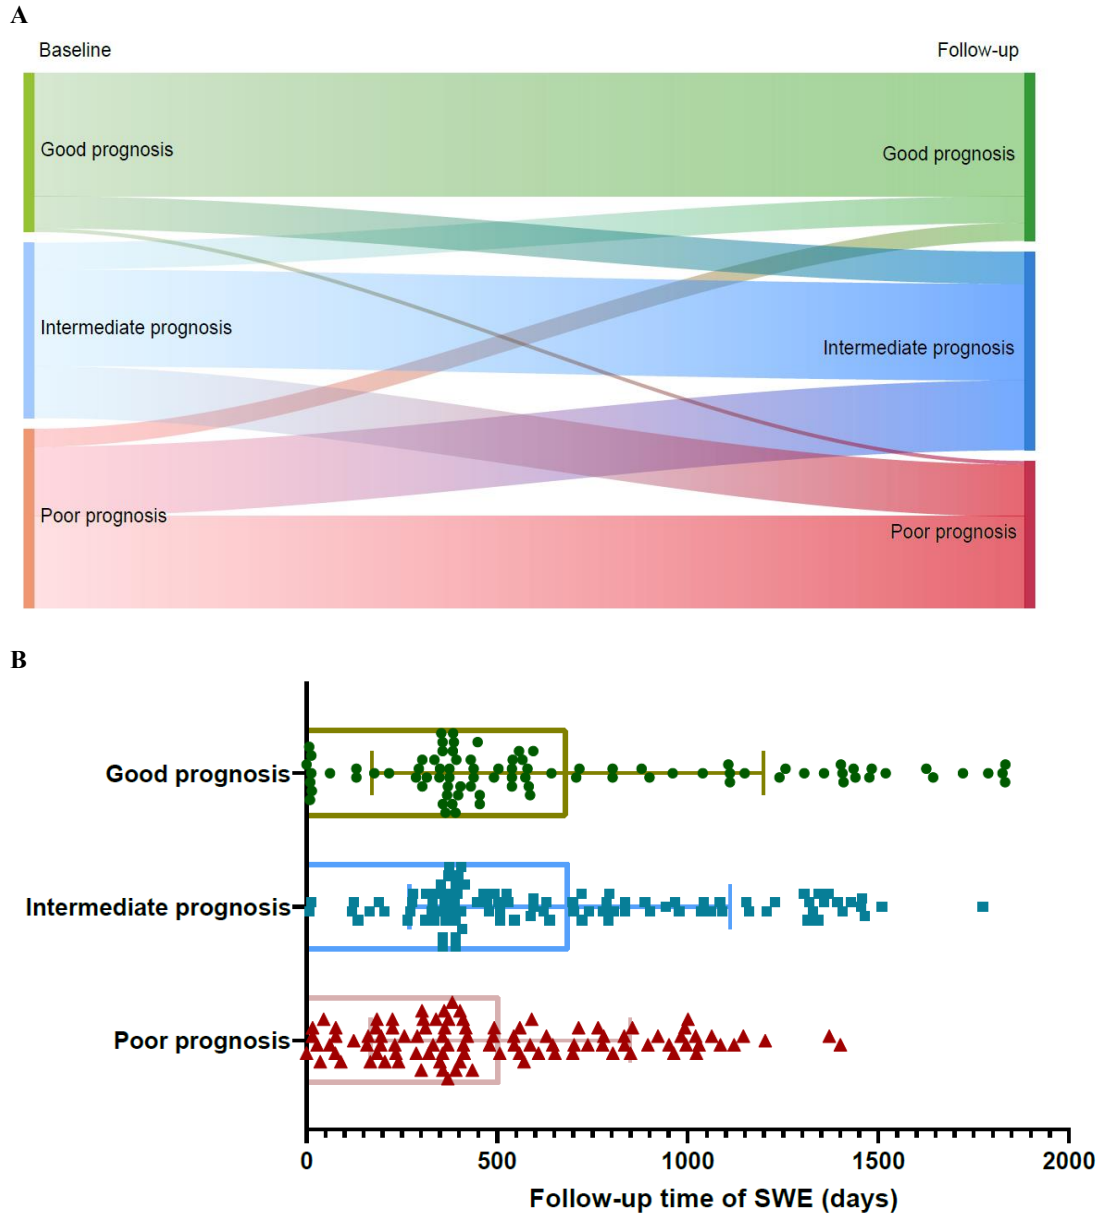

---

**Supplementary reference**

1. Dietrich CF, Bamber J, Berzigotti A, et al. EFSUMB Guidelines and Recommendations on the Clinical Use of Liver Ultrasound Elastography, Update 2017 (Long Version). *Ultraschall Med* 2017; **38**(4): e16-e47.
2. Ferraioli G, Wong VW, Castera L, et al. Liver Ultrasound Elastography: An Update to the World Federation for Ultrasound in Medicine and Biology Guidelines and Recommendations. *Ultrasound Med Biol* 2018; **44**(12): 2419-40.
3. Jansen C, Möller P, Meyer C, et al. Increase in liver stiffness after transjugular intrahepatic portosystemic shunt is associated with inflammation and predicts mortality. *Hepatology* 2018; **67**(4): 1472-84.
4. EASL-ALEH Clinical Practice Guidelines: Non-invasive tests for evaluation of liver disease severity and prognosis. *J Hepatol* 2015; **63**(1): 237-64.
5. Bucsics T, Grasl B, Ferlitsch A, et al. Point Shear Wave Elastography for Non-invasive Assessment of Liver Fibrosis in Patients with Viral Hepatitis. *Ultrasound Med Biol* 2018; **44**(12): 2578-86.
6. Ferraioli G, De Silvestri A, Reiberger T, et al. Adherence to quality criteria improves concordance between transient elastography and ElastPQ for liver stiffness assessment-A multicenter retrospective study. *Dig Liver Dis* 2018; **50**(10): 1056-61.
7. [EASL clinical practice guidelines on the management of ascites, spontaneous bacterial peritonitis, and hepatorenal syndrome in cirrhosis. J Hepatol 2010; 53\(3\): 397-417.](#)
8. [Johnson PJ, Berhane S, Kagebayashi C, et al. Assessment of liver function in patients with hepatocellular carcinoma: a new evidence-based approach-the ALBI grade. J Clin Oncol 2015; 33\(6\): 550-8.](#)
9. [Chou R, Wasson N. Blood tests to diagnose fibrosis or cirrhosis in patients with chronic hepatitis C virus infection: a systematic review. Ann Intern Med 2013; 158\(11\): 807-20.](#)
10. [Sterling RK, Lissen E, Clumeck N, et al. Development of a simple noninvasive index to predict significant fibrosis in patients with HIV/HCV coinfection. Hepatology 2006; 43\(6\): 1317-25.](#)
